## **Mitofusins 1 and 2 collaborate to fuel pancreatic beta cell insulin release via regulation of both mitochondrial structure and DNA content**

Vaibhav Sidarala<sup>1\*</sup>; Jie Zhu<sup>1\*</sup>; Gemma L. Pearson<sup>1</sup>; Emma C. Reck<sup>1</sup>; Brett A. Kaufman<sup>2</sup>; and Scott A. Soleimanpour<sup>1,3</sup>

<sup>1</sup>Division of Metabolism, Endocrinology & Diabetes and Department of Internal Medicine, University of Michigan Medical School, Ann Arbor, MI 48105, USA.

<sup>2</sup>Vascular Medicine Institute, Division of Cardiology, Department of Medicine, University of Pittsburgh School of Medicine, Pittsburgh, PA, 15260, USA

<sup>3</sup>VA Ann Arbor Healthcare System, Ann Arbor, MI 48105, USA.

\*These authors contributed equally to this work

### **Lead contact**

Scott A. Soleimanpour, MD, 1000 Wall Street, Brehm Tower Room 5317, Ann Arbor, MI 48105.

Phone: (734) 763-0528 E-mail: [ssol@med.umich.edu](mailto:ssol@med.umich.edu)

## ABSTRACT

Mitochondria are vital for  $\beta$ -cell function, yet the importance of mitochondrial fusion for glucose homeostasis is uncertain. Here, we report that the dynamin-like GTPases Mitofusin 1 and 2 (Mfn1 and Mfn2) are critical for glucose-stimulated insulin secretion (GSIS). Whereas Mfn1 and Mfn2 individually were dispensable for glucose control, combined Mfn1/2 deletion in  $\beta$ -cells induced mitochondrial fragmentation, reduced mtDNA content, and impaired respiratory function, ultimately resulting in severe glucose intolerance. Importantly, gene dosage studies revealed that Mfn1/2 control of glucose homeostasis is dependent on maintenance of mtDNA content, rather than mitochondrial structure. Mfn1/2 maintain mtDNA content by regulating the expression of the crucial mitochondrial transcription factor Tfam, as Tfam overexpression ameliorated the reduction in mtDNA content and GSIS in Mfn1/2-deficient  $\beta$ -cells. Further, mitofusin agonists rescued mtDNA content and GSIS in islets from *db/db* mice, a model of type 2 diabetes. Thus, Mfn1 and 2 act collectively to promote both optimal mitochondrial dynamics and mtDNA copy number in  $\beta$ -cells, and may be promising therapeutic targets to improve insulin release in diabetes.



## INTRODUCTION

Mitochondrial dynamics, the balance of fusion and fission of mitochondrial networks, is essential to control mitochondrial structure and cellular metabolic activity. Imbalances in mitochondrial dynamics impair cellular bioenergetics in numerous metabolically active tissues and have been implicated in many human diseases, including neurodegenerative conditions, cancer, cardiovascular disease, and diabetes (1). All forms of diabetes are manifest by the loss of pancreatic  $\beta$ -cell mass or function to meet peripheral insulin secretory demand. Mitochondria are essential to provide the energy necessary for  $\beta$ -cell insulin release (2, 3), and abnormalities in mitochondrial structure and bioenergetics have been observed in the  $\beta$ -cells of humans with type 2 diabetes (T2D; (4, 5)). Therefore, strategies to understand and overcome mitochondrial dysfunction in  $\beta$ -cells are of great appeal for the prevention or treatment of T2D.

Mitochondrial fission and fusion are governed by several key proteins that maintain mitochondrial quality control (1, 6). Fission is primarily regulated by the GTPase dynamin-related protein 1 (Drp1), while fusion is controlled by both outer and inner mitochondrial membrane machinery. The dynamin-related large GTPase optic atrophy protein 1 (Opa1) controls inner membrane fusion, while outer membrane fusion is controlled by two GTPases known as Mitofusin 1 and 2 (Mfn1 and Mfn2). Mitofusin 1 and 2 share ~80% sequence similarity and contain homologous functional domains, suggesting they play redundant roles in mitochondrial health. However, recent evidence indicates unique functions for each protein, likely related to distinct protein interaction partners, post-translational modifications, and localization at the mitochondrial surface (7). While an optimal balance of fission and fusion is essential for metabolic function in many tissues (8), the role of the core fission/fusion machinery in  $\beta$ -cells is less clear. For example, deletion of Drp1 in  $\beta$ -cells leads to glucose intolerance but does not alter mitochondrial respiration (9). Moreover, the functions of Mfn1 and Mfn2 in  $\beta$ -cells *in vivo* are unexplored.

Here we elucidate a key role for Mfn1 and 2 in the maintenance of glucose homeostasis through their combined effects on mitochondrial health in pancreatic  $\beta$ -cells and, consequently,

glucose-stimulated insulin secretion (GSIS). Utilizing genetic mouse models, high resolution imaging, and transcriptomic profiling, we show that Mfn1 and 2 maintain glycemic control and GSIS by preserving mitochondrial structure, mtDNA content, and expression of the mitochondrial transcription factor Tfam, which is a master regulator of mtDNA copy number control and mtRNA expression (10, 11). Adenoviral overexpression of Tfam ameliorates reductions in mtDNA content and GSIS in Mfn1/2-deficient  $\beta$ -cells. Finally, we demonstrate that pharmacologic mitofusin agonists restore mtDNA content and GSIS in the *db/db* mouse model of T2D, illustrating the feasibility of targeting  $\beta$ -cell mitochondrial dynamics and mtDNA depletion in diabetes.

## RESULTS

### Combined deficiency of Mfn1 and Mfn2 in $\beta$ -cells leads to severe glucose intolerance and reduced glucose-stimulated insulin secretion

Mitochondrial health is vital to support  $\beta$ -cell insulin secretory responses to glucose or other nutrient stimuli. We hypothesized that Mfn1 and Mfn2 are required for GSIS in  $\beta$ -cells through their regulation of mitochondrial structure and function. To test this hypothesis, we generated mice bearing  $\beta$ -cell specific deletion of Mfn1 alone (*Mfn1*<sup>loxP/loxP</sup>; *Ins1*-Cre), Mfn2 alone (*Mfn2*<sup>loxP/loxP</sup>; *Ins1*-Cre), and combined deletion of both Mfn1 and 2 (*Mfn1*<sup>loxP/loxP</sup> *Mfn2*<sup>loxP/loxP</sup>; *Ins1*-Cre), hereafter known as  $\beta$ -Mfn1<sup>KO</sup>,  $\beta$ -Mfn2<sup>KO</sup>, and  $\beta$ -Mfn1/2<sup>DKO</sup> mice, respectively.  $\beta$ -Mfn1<sup>KO</sup>,  $\beta$ -Mfn2<sup>KO</sup>, and  $\beta$ -Mfn1/2<sup>DKO</sup> mice each exhibited an efficient reduction in Mfn1 and/or Mfn2 islet protein expression, respectively, when compared to littermate controls (Ctrl; Figure 1A). We did not observe a compensatory increase in Mfn2 expression in  $\beta$ -Mfn1<sup>KO</sup> islets, nor in Mfn1 expression in  $\beta$ -Mfn2<sup>KO</sup> islets (Figure 1A). Further, we did not observe differences in expression of the other core fission/fusion proteins, Drp1 and Opa1, following deletion of Mfn1 or Mfn2 (Figure S1A).

While loss of either Mfn1 or Mfn2 alone has been shown to impair glucose homeostasis in other metabolic tissues (7, 8), we were surprised to find that both  $\beta$ -Mfn1<sup>KO</sup> and  $\beta$ -Mfn2<sup>KO</sup> mice exhibited normal glucose homeostasis during an intraperitoneal glucose tolerance test (IPGTT; Figure 1B). We also observed no changes in insulin secretion in single  $\beta$ -Mfn1<sup>KO</sup> or  $\beta$ -Mfn2<sup>KO</sup> mice after glucose administration *in vivo* (Figure 1C) or in isolated islets (Figure 1D). However, combined deletion of both Mfn1 and Mfn2 resulted in severe glucose intolerance (Figure 1B;  $p < 0.005$  by ANOVA vs. Ctrl), due to markedly reduced GSIS (Figures 1C-D).

To evaluate other etiologies of glucose intolerance in  $\beta$ -Mfn1/2<sup>DKO</sup> mice, we measured  $\beta$ -cell mass and insulin content. We observed no significant differences in  $\beta$ -cell mass or islet insulin content between genotypes (Figures 1E-F). There were also no differences in body weight or peripheral insulin sensitivity between the groups (Figures S1B-C). Taken together, these studies

suggest that Mfn1 and 2 are individually dispensable for glycemic control and GSIS, but together play vital complementary roles for the maintenance of glucose tolerance and  $\beta$ -cell insulin release.

### **Mfn1 and 2 regulate $\beta$ -cell mitochondrial structure and respiratory function**

Given the connections between mitochondrial function and dynamics, we asked whether mitochondrial respiration and architecture would be defective in the islets of  $\beta$ -Mfn1/2<sup>DKO</sup> mice. Indeed, islets isolated from  $\beta$ -Mfn1/2<sup>DKO</sup> mice displayed a reduced glucose-stimulated oxygen consumption rate (OCR; Figure 2A) when compared to Ctrl islets. We did not observe differences in glycolysis as measured by extracellular acidification rate (data not shown). Differences in glucose-stimulated OCR between Ctrl and  $\beta$ -Mfn1/2<sup>DKO</sup> islets were no longer observed following exposure to the Complex III inhibitor antimycin A, suggesting that Mfn1/2-deficient islets primarily possess a defect in  $\beta$ -cell mitochondrial respiration (Figure 2A).

Loss of key mediators of mitochondrial fusion disrupt mitochondrial network balance and favor increased mitochondrial fission, often leading to the appearance of increased mitochondrial fragmentation (12). We thus examined mitochondrial structure in Mfn1- and/or Mfn2-deficient  $\beta$ -cells by two independent and complementary methods. First, we assessed  $\beta$ -cell mitochondrial ultrastructure by transmission electron microscopy (TEM). While  $\beta$ -cells from all groups had the expected appearance of electron dense insulin granules,  $\beta$ -cells from  $\beta$ -Mfn1/2<sup>DKO</sup> mice had reductions in mitochondrial aspect ratio, form factor, and perimeter, and increased mitochondrial circularity (Figures 2B-C), indicating smaller, fragmented mitochondria. Secondly, we examined mitochondrial morphology and networks utilizing high-resolution deconvolution imaging of the mitochondrial marker succinate dehydrogenase A (SDHA) to generate three-dimensional (3D) reconstructions of  $\beta$ -cell mitochondria (13, 14). Consistent with our findings using TEM, the 3D mitochondrial appearance was similar between Ctrl and single  $\beta$ -Mfn1<sup>KO</sup> or  $\beta$ -Mfn2<sup>KO</sup>  $\beta$ -cells (Figure 2D). However, Mfn1/2-double deficient mice showed a dramatic increase in the frequency of smaller, vesiculated  $\beta$ -cell mitochondrial networks, consistent with fragmentation (Figure 2D).

3D quantification confirmed that measures of mitochondrial morphology (reduced mitochondrial volume and increased sphericity) and network/branch complexity (reduced branch number and branch junctions) were significantly impaired in  $\beta$ -Mfn1/2<sup>DKO</sup> mice, commensurate with an increase in mitochondrial fragmentation due to decreased mitochondrial fusion (Figure 2E). Together, these data demonstrate that Mfn1 and 2 combine to maintain  $\beta$ -cell mitochondrial structure and function.

### **Mfn1 and 2 maintain $\beta$ -cell mtDNA content**

Mitochondrial DNA copy number is vital for  $\beta$ -cell function and glucose homeostasis (15, 16). A link between mitochondrial fusion and mtDNA maintenance has been previously observed in skeletal and cardiac muscle, yet the etiology and metabolic impact of mtDNA depletion by imbalances in mitochondrial dynamics remain uncertain (17-19). Thus, we next examined whether mtDNA content was altered by loss of Mfn1 and/or Mfn2 in  $\beta$ -cells. We observed a small, yet significant, reduction in mtDNA content in islets of  $\beta$ -Mfn2<sup>KO</sup> mice that was not observed in islets of  $\beta$ -Mfn1<sup>KO</sup> mice (Figure 3A). Interestingly, mtDNA depletion substantially worsened in the islets of  $\beta$ -Mfn1/2<sup>DKO</sup> mice (Figure 3A), suggesting that loss of Mfn1 exacerbates the depletion of mtDNA caused by Mfn2 deficiency. We next assessed expression of the 13 mitochondrially encoded genes and observed a consistent and significant reduction in mtRNA expression in  $\beta$ -Mfn2<sup>KO</sup> islets that was exacerbated in  $\beta$ -Mfn1/2<sup>DKO</sup> mice (Figure 3B). Concordantly, examination of protein expression of mitochondrial OXPHOS subunits by Western blot also revealed a reduction of the mitochondrially encoded subunit of Complex IV, mt-Co1, in  $\beta$ -Mfn2<sup>KO</sup> islets and  $\beta$ -Mfn1/2<sup>DKO</sup> islets (Figures 3C-D). We also observed significant reductions of nuclear encoded subunits of Complex I (Ndufb8) in both  $\beta$ -Mfn2<sup>KO</sup> and  $\beta$ -Mfn1/2<sup>DKO</sup> islets and Complex III (Uqcrc2) in  $\beta$ -Mfn1/2<sup>DKO</sup> islets, but no significant depletion of nuclear encoded Complex II (Sdhb) and Complex V (Atp5a) (Figures 3C-D). These studies reveal that both Mfn1 and 2 (and Mfn2 alone to a lesser degree)

are necessary to maintain mtDNA copy number, mtRNA expression, and expression of OXPHOS subunits in  $\beta$ -cells.

### **Defects in $\beta$ -cell mitochondrial fusion induce glucose intolerance upon concomitant loss of mtDNA content**

Our observations showing distinct and overlapping contributions of Mfn1 and 2 in the regulation of  $\beta$ -cell mitochondrial function led us to hypothesize that loss of mitochondrial fusion would lead to glucose intolerance upon concomitant depletion of mtDNA content. To this end, we performed studies generating animals harboring only a single functional allele of either *Mfn1* ( $\beta$ -Mfn1<sup>+/-</sup>Mfn2<sup>KO</sup>) or *Mfn2* ( $\beta$ -Mfn1<sup>KO</sup>Mfn2<sup>+/-</sup>) to ascertain the importance of Mfn1 versus Mfn2 in the maintenance of glycemic control, mitochondrial structure, and mtDNA content. For robustness of interpretation, these experiments were performed simultaneously alongside littermate controls and  $\beta$ -Mfn1/2<sup>DKO</sup> mice as previously presented (Figures 1-3). 3D quantification of mitochondrial morphology and network integrity revealed that, similar to  $\beta$ -Mfn1/2<sup>DKO</sup> mice, a single allele of either *Mfn1* or *Mfn2* was not sufficient to maintain  $\beta$ -cell mitochondrial structure and led to increased mitochondrial fragmentation (Figure 4A-B).

Despite increased mitochondrial fragmentation in both  $\beta$ -Mfn1<sup>+/-</sup>Mfn2<sup>KO</sup> and  $\beta$ -Mfn1<sup>KO</sup>Mfn2<sup>+/-</sup> mice, only  $\beta$ -Mfn1<sup>+/-</sup>Mfn2<sup>KO</sup> mice developed glucose intolerance and impaired GSIS similar to that of  $\beta$ -Mfn1/2<sup>DKO</sup> mice (Figures 4C-D). In addition, neither  $\beta$ -Mfn1<sup>+/-</sup>Mfn2<sup>KO</sup> nor  $\beta$ -Mfn1<sup>KO</sup>Mfn2<sup>+/-</sup> mice developed differences in  $\beta$ -cell mass, body weight, or insulin sensitivity compared to controls (Figures S2A-C), suggesting that the glucose intolerance observed in  $\beta$ -Mfn1<sup>+/-</sup>Mfn2<sup>KO</sup> mice was due to reduced insulin secretion. Interestingly, we found significant reductions in mtDNA content associated with the loss of GSIS observed in  $\beta$ -Mfn1<sup>+/-</sup>Mfn2<sup>KO</sup> and  $\beta$ -Mfn1/2<sup>DKO</sup> mice (Figure 4E). Importantly, these results disjoin  $\beta$ -cell function from changes in mitochondrial morphology alone, but rather implicate mtDNA copy number as the vital purveyor of glycemic control following loss of mitochondrial fusion. Taken together, maintenance of a single

functional allele of *Mfn2*, but not *Mfn1*, is able to preserve glucose homeostasis, mtDNA content, and insulin secretion, indicating an elevated importance for *Mfn2* over *Mfn1* in their complementary control of  $\beta$ -cell function. Moreover, these studies suggest that defects in mitochondrial fusion necessitate a parallel depletion of mtDNA content to lead to  $\beta$ -cell dysfunction and glucose intolerance.

### **Mfn1 and 2 deficiency induces a transcriptional signature consistent with defects in mitochondrial metabolism and alterations in mtDNA replication**

To begin to understand the mechanisms underlying control of mtDNA content by *Mfn1* and 2, we analyzed bulk RNA sequencing (RNAseq) data generated from islets of  $\beta$ -*Mfn1*<sup>KO</sup>,  $\beta$ -*Mfn2*<sup>KO</sup>, and  $\beta$ -*Mfn1/2*<sup>DKO</sup> mice as well as littermate controls. Initial hierarchical clustering analyses based on the top 500 most highly expressed genes revealed that only  $\beta$ -*Mfn1/2*<sup>DKO</sup> islets clustered by genotype, while we did not observe discrete clustering across Ctrl or single  $\beta$ -*Mfn1*<sup>KO</sup> and  $\beta$ -*Mfn2*<sup>KO</sup> islets due to very few differences in expression between these groups (Figures 5A and S3A-B). Gene ontology and pathway analyses of differentially expressed genes from  $\beta$ -*Mfn1/2*<sup>DKO</sup> islets revealed significant changes related to endocrine hormone/insulin secretion,  $\beta$ -cell signature genes, as well as several metabolic pathways (Figures 5B and S3C-D), consistent with the defects in  $\beta$ -cell function and mitochondrial metabolism observed in  $\beta$ -*Mfn1/2*<sup>DKO</sup> mice.

The nearly 1,000 significantly dysregulated genes in  $\beta$ -*Mfn1/2*<sup>DKO</sup> islets included downregulation of mitochondrial encoded transcripts, as well as key  $\beta$ -cell signature genes such as *Glut2* and *MafA* (Figures 5C and 5E). We also observed increases in expression of regulators of triglyceride metabolism, including *Angptl4* and *Angptl8* (20), the glycolytic/gluconeogenic enzyme *AldoB*, which is highly upregulated in models of  $\beta$ -cell mitochondrial dysfunction and in T2D islets (21, 22), as well as *Nrf1*, a key regulator of mitochondrial biogenesis (Figures 5C, 5E, and S3D; (23)). To resolve additional mitochondrial specific effectors that were differentially regulated following the loss of *Mfn1* and 2, we next overlaid our RNAseq data on MitoCarta 2.0

(24), which contains a compendium of targets with strong evidence for localization to the mitochondria (Figure 5D). This revealed increased expression of several genes related to mtDNA replication machinery or associated with the mitochondrial nucleoid (Figures 5D-E), including the critical mtDNA topoisomerase Top1mt (25), the mitochondrial co-chaperone Dnaja3/Tid1, which maintains mtDNA integrity (26), and the mitochondrial pyrimidine transporter Slc25a33, which is essential for mtDNA replication (Figures 5D-E; (27)). We also observed upregulation in the mitochondrial AAA+ protease LonP1, which interacts with and regulates the stability of numerous proteins at the mitochondrial nucleoid (Figures 5D-E; (28-30)). Importantly, we did not observe changes in expression of other fission/fusion genes or regulators of mtRNA transcription, mtDNA repair, sirtuins, or mitophagy (Figure S3D). Taken together, these data indicate that Mfn1/2-deficiency induced a transcriptional signature consistent with an activation of mtDNA replication to potentially compensate for  $\beta$ -cell mtDNA depletion.

### **Mfn1 and 2 act through Tfam to regulate $\beta$ -cell mtDNA copy number**

The mechanisms underlying regulation of mtDNA by mitochondrial fusion have been controversial, and the results of previous studies of Mfn1 and/or Mfn2 deficiency implicate several pathways that could reduce mtDNA content, including genome instability/increased mtDNA mutations, enhanced mitophagy, or impaired mtDNA replication (17, 18, 31). As our studies were completed in young mice, which bear infrequent mtDNA mutations (32), and we did not observe differences in expression of mtDNA repair enzymes (Figure S3D), we focused on assessments of mitophagy and mtDNA replication to better resolve the significant reduction of mtDNA observed in  $\beta$ -Mfn1/2<sup>DKO</sup> islets. We first assessed rates of mitophagy following incubation of control and  $\beta$ -Mfn1/2<sup>DKO</sup> islets with the cell permeable Mtpagy dye, and did not observe differences in mitophagy between genotypes (Figure S3E). We also did not observe a difference in frequency of autophagosomes bearing mitochondria by TEM, or changes in essential genes in the mitophagy pathway between control and  $\beta$ -Mfn1/2<sup>DKO</sup> islets (Figure S3D and data not shown).



To assess regulators of  $\beta$ -cell mtDNA replication, we examined expression of the replisome proteins Ssbp1, Twinkle, and Polg, as well as Tfam, a nucleoid protein which both regulates mtDNA content and whose levels are proportional to mtDNA copy number (10). While replisome proteins were largely unchanged, we observed a significant reduction in Tfam protein in  $\beta$ -Mfn1/2<sup>DKO</sup> islets (Figures 6A-B). Notably, Tfam mRNA expression was unchanged in  $\beta$ -Mfn1/2<sup>DKO</sup> mice (Figure S3D), suggesting the reduction in Tfam protein occurred post-transcriptionally. We further observed a significant increase in the level of LonP1 protein, which has been shown to lead to Tfam protein turnover (33, 34).

To test for defects in mtDNA replication, we next assessed initiation of first strand replication. First strand synthesis in mitochondrial replication begins in the D-loop. However, a single stranded (ss) molecule that forms the classic D-loop structure called 7S, which is a non-replicative structure, shares this sequence. It is the elongation of the 7S sequence into the nearby region (Cytb) that demonstrates committed initiation of replication. Here we assessed the levels of ss and dsDNA at specific sequences by quantitative PCR to overcome expected sample limitations from studies with mouse pancreatic islets. Notably, import of nascent Tfam has been shown to increase the generation of 7S DNA due to its transcription initiation activity (35). We found a trend towards reduced total ss 7S sequences normalized to ds mtDNA in  $\beta$ -Mfn1/2<sup>DKO</sup> islets (Figure 6C). However, we found that the rate of 7S sequence extension into committed first strand replication to be strongly stimulated in  $\beta$ -Mfn1/2<sup>DKO</sup> islets (Figure 6C), which could represent a compensatory response to mtDNA depletion.

Increased first strand replication intermediates heighten the levels of displaced second strand template, which is bound by the single strand binding protein Ssbp1 (36). Consistent with ss qPCR studies, in situ levels of Ssbp1 at the mtDNA nucleoid (detected by perinuclear anti-DNA antibody staining), were significantly elevated in Mfn1/2-deficient  $\beta$ -cells (Figures 6D-E). The increase in Ssbp1 localization to mitochondrial nucleoids could represent binding to a higher quantity of single-stranded mtDNA replication intermediates and could also be consistent with

observations of impaired completion of mtDNA replication previously reported following Mfn1/2-deficiency (18, 37). We also observed Ssbp1 nuclear localization (Figures 6D and F), which has been previously observed following mitochondrial stress (38). Further, we observed an increase in the volume of mtDNA nucleoid structures in Mfn1/2-deficient  $\beta$ -cells by high-resolution 3D imaging (Figures 6G-H), which are similar to previous reports of Tfam-deficiency but could also represent impaired nucleoid distribution (18, 39, 40). Taken together, our observations of reduced mtDNA content, mtRNA expression, as well as changes in single-stranded mtDNA products, Ssbp1 localization, and nucleoid size following Mfn1/2-deficiency could be suggestive of a role for Tfam in mediating the effects of Mfn1/2 in  $\beta$ -cell function.

To test whether increasing mtDNA copy number was sufficient to improve  $\beta$ -cell function in fusion-deficient islets, we overexpressed Tfam in  $\beta$ -Mfn1/2<sup>DKO</sup> and littermate control islets. We transduced intact islets using adenoviral vectors encoding the human form of TFAM, thus allowing us to track overexpression of TFAM using human-specific TFAM anti-sera (Figures 7A and S4). Transduction efficiency in  $\beta$ -cells was estimated at ~50% (Figure S4). TFAM overexpression ameliorated the reductions in both GSIS and mtDNA copy number in  $\beta$ -Mfn1/2<sup>DKO</sup> islets (Figures 7B-C). Therefore, Mfn1 and 2 direct  $\beta$ -cell function, at least in part, through the regulation of Tfam-mediated mtDNA copy number control.

### **Mitofusin agonists restore mtDNA content and improve GSIS in a mouse model of T2D**

Mitochondrial structural and functional defects have been previously reported in islets of human T2D donors (4, 5), yet it is unknown if defects in the mitochondrial fusion machinery contribute to  $\beta$ -cell dysfunction in T2D. Thus, we first evaluated the expression of Mfn1 and 2 in islets isolated from the leptin receptor deficient *db/db* model of T2D, which develops obesity, progressive  $\beta$ -cell mitochondrial and insulin secretory dysfunction, and eventual  $\beta$ -cell failure (41-45). We observed that Mfn2, but not Mfn1, protein levels were reduced in islets of 10-12 week old *db/db* mice when compared to *db/+* controls (Figures 8A-B), measured at an age prior to  $\beta$ -cell failure (41, 42).

To determine if targeting mitofusins could attenuate  $\beta$ -cell dysfunction in T2D, we treated *db/db* islets with recently described pharmacological tandem mitofusin agonists, (2-{2-[(5-cyclopropyl-4-phenyl-1,2,4-triazol-3-yl)sulfanyl]propanamido}-4H,5H,6H-cyclopenta[b]thiophene-3-carboxamide and 1-[2-(benzylsulfanyl)ethyl]-3-(2-methylcyclohexyl)urea (hereafter called Mfn agonists), which together mimic an open Mfn2 conformation favoring mitochondrial fusion but require some residual mitofusin levels to be effective (46). We initially treated control and  $\beta$ -Mfn2<sup>KO</sup> islets with Mfn agonists to validate their function and determine if they could be extended to relieve defects in islet mtDNA content caused by Mfn2-deficiency. Indeed, Mfn agonists restored mtDNA content to baseline in  $\beta$ -Mfn2<sup>KO</sup> islets (Figure S5). Similar to the decreased mtDNA content found in Mfn2-deficient islets, we also found a significant reduction in mtDNA in *db/db* islets, which was rescued by treatment with Mfn agonists (Figure 8D). Remarkably, Mfn agonists also improved GSIS in the islets of *db/db* mice (Figures 8E), potentially illustrating beneficial effects for targeting mitofusins in T2D. These studies suggest that Mfn2-deficiency, while normally dispensable for  $\beta$ -cell function, could lead to aberrant effects in the context of obesity. Moreover, these results extend the association between mitofusin deficiency, mtDNA depletion, and impaired GSIS in  $\beta$ -cells.

## DISCUSSION

Here, we identify that Mfn1 and 2 promote mitochondrial fitness to fuel glucose-stimulated insulin release in pancreatic  $\beta$ -cells and maintain glucose homeostasis. Mfn1 or Mfn2 are individually dispensable for  $\beta$ -cell function, but together coordinately control mitochondrial respiration, structure, and mtDNA content. We demonstrate that both mtDNA depletion and mitochondrial fragmentation are required to cause  $\beta$ -cell secretory dysfunction following the loss of Mfn1 and 2. Moreover, pharmacologic targeting of mitofusins improves mtDNA content and insulin secretion in a mouse model of T2D.

Whereas previous reports have displayed reduced mtDNA after loss of Mfn1 and 2, it was unclear if mtDNA depletion was a primary driver for cellular dysfunction (17, 18). Importantly, our single allele mouse models demonstrate that Mfn1/2-deficiency is coupled to glucose intolerance through loss of mtDNA content. Further, we observe that increased mtDNA copy number following Tfam overexpression is capable of ameliorating impaired GSIS in fusion-deficient  $\beta$ -cells. Thus, our studies position the regulation of mtDNA content by Mfn1 and 2 as a critical task necessary for the maintenance of insulin secretion.

While our data suggest that Tfam mediates the effects of Mfn1/2 on mtDNA content and GSIS in  $\beta$ -cells, the mechanisms for post-transcriptional loss of Tfam in  $\beta$ -Mfn1/2<sup>DKO</sup> islets are unclear. Loss of Tfam may be due to increased LonP1 expression, which is known to degrade Tfam (33, 34); however, the function and transcriptional regulation of LonP1 in  $\beta$ -cells are unknown and require future study. We also observe that  $\beta$ -Mfn1/2<sup>DKO</sup> islets attempt unsuccessfully to compensate for mtDNA depletion. Our analyses of first strand replication suggest that Mfn1/2-deficient  $\beta$ -cells increase the activation of early steps in mtDNA replication, which is supported by increased Ssbp1 localization to nucleoids to potentially bind newly formed ss-mtDNA. Despite these changes, mtDNA content remains low in Mfn1/2-deficient  $\beta$ -cells, suggesting that the increased commitment to replication is insufficient. Indeed, increased nucleoid Ssbp1 may be engaged in binding abnormal single-stranded replication products (37). Importantly, in support of

our findings, a recent report found that Mfn1/2-deficiency induced impaired mtDNA replication, marked by increased nucleoid Ssbp1 localization, abnormal nucleoid size and distribution, and an accumulation of abnormal replication products (18). The increased expression of Top1mt found in Mfn1/2-deficient  $\beta$ -cells could also represent a response to increased mitochondrial replication stress (47). Additional experimentation will be required to dissect the molecular details underlying the connections between mitochondrial fusion and control of  $\beta$ -cell mtDNA replication.

Mitochondrial structural and functional defects have been observed in  $\beta$ -cells from patients with T2D, likely contributing to reduced glucose-stimulated insulin release (4, 5). Mitochondrial fission/fusion disturbances may also lead to downstream extramitochondrial effects that could contribute to  $\beta$ -cell failure, but these have not yet been explored in T2D. Notably,  $\beta$ -cell Drp1 deficiency reduces second phase insulin release and the amplification pathway of insulin secretion (9), and  $\beta$ -cell Opa1 deficiency impairs entry into the cell cycle, thereby reducing  $\beta$ -cell replication (48). We observe significant hyperglycemia, reduced Tfam expression, and mtDNA depletion in young  $\beta$ -Mfn1/2<sup>DKO</sup> mice that could potentially promote eventual glucotoxicity or an age-related loss of  $\beta$ -cell mass, similar to a previous report of selective Tfam deficiency in  $\beta$ -cells (16). We also detect an increase of nuclear Ssbp1 following loss of mitochondrial fusion, which has been suggested to activate a mitochondrial stress response (38). Investigation of the extramitochondrial effects which emanate from disruptions in mitochondrial networks will be essential to understand how the early defects in mitochondrial-potentiated insulin release cause progressive loss of  $\beta$ -cell mass in T2D.

Restoration of  $\beta$ -cell health and function is a key goal for the treatment of T2D. Our studies demonstrate the feasibility of therapeutic use of fusogenic compounds in the restoration of mtDNA and GSIS in islets of *db/db* mice. Beyond the use of mitofusin agonists, other recently identified compounds targeting pyrimidine metabolism to induce Mfn1/2 transcription (49) will be of interest to determine if they can improve  $\beta$ -cell function and mtDNA content. Our observation of the upregulation of mitochondrial pyrimidine transporter Slc25a33 in  $\beta$ -Mfn1/2<sup>DKO</sup> islets is consistent

with links between pyrimidine metabolism and mitochondrial fusion, which suggest these compounds could hold promise to enhance  $\beta$ -cell mitochondrial function. Future studies will be required to fully characterize the efficacy of targeting mitochondrial fusion *in vivo* to treat T2D.

## METHODS

### Animals

*Mfn1*<sup>loxP/loxP</sup> and *Mfn2*<sup>loxP/loxP</sup> mice possessing loxP sites flanking exon 4 of the *Mfn1* gene and exon 6 of the *Mfn2* gene, respectively, were purchased from Jackson Laboratories (50). *Mfn1*<sup>loxP</sup> and *Mfn2*<sup>loxP</sup> mice were mated to *Ins1*-Cre (51) to generate experimental groups. *Ins1*-Cre-alone, *Mfn1*<sup>loxP/loxP</sup> and *Mfn2*<sup>loxP/loxP</sup> mice were phenotypically indistinguishable from each other and combined as controls (Ctrl). These animals were all maintained on the C57BL/6N background. *db/+* and *db/db* mice, maintained on the BKS background, were purchased from Jackson Laboratories. Animals were housed on a standard 12-hour light/12-hour dark cycle with ad libitum access to food and water. All studies were completed using both male and female mice.

### Mitochondrial respirometry

Islet respirometry was measured using an XF96 extracellular flux analyzer (Seahorse Bioscience) according to manufacturer's instructions. Briefly, 20 similarly sized islets were plated per well of a Seahorse spheroid plate pre-treated with CellTak (Corning), similar to previously published approaches (52). Prior to respirometry profiling, islets were incubated for 1 hour in an atmospheric CO<sub>2</sub> incubator at 37°C and supplemented with mouse islet culture media (53, 54) comprised of pH 7.4 unbuffered RPMI1640 media (Seahorse Bioscience) and 2mM glucose prior to flux analyzer assays. Analysis was performed at baseline, upon exposure to 20mM glucose, and again after treatment with 2 μM antimycin A. OCR measurements were normalized to islet number confirmed by light microscopy (Zeiss Stemi 2000) after the completion of respirometry assays.

### Transmission electron microscopy

Mouse islets were pelleted, fixed in 3% glutaraldehyde and 3% paraformaldehyde in 0.1 M Cacodylate buffer (CB; pH 7.2) overnight at 4°C. Islets were then embedded in 2% agarose as described previously (55). Samples were then subjected to osmification in 1.5% K<sub>4</sub>Fe(CN)<sub>6</sub> + 2% OsO<sub>4</sub> in 0.1 CB for 1 h, dehydrated by serial washes in EtOH (30%, 50%, 70%, 80%, 90%, 95% and 100%) and embedded in Spurr's resin by polymerization at 60° C for 24h. Polymerized resins

were then sectioned at 90nm thickness using a Leica EM UC7 ultramicrotome and imaged at 70kV using a JEOL 1400 TEM equipped with an AMT CMOS imaging system. Mitochondrial structures (Aspect Ratio, Perimeter, Circularity) were analyzed and quantified by ImageJ. Form factor assessments were analyzed by ImageJ and quantified as described (14).

### **Mitochondrial morphology and subcellular localization**

Mitochondrial morphology and subcellular localization analyses were performed on immunostained paraffin-embedded mouse pancreas tissue sections and dissociated islet cells as previously described (13). Z-stack images of immunostained pancreatic sections were captured with an IX81 microscope (Olympus) using an ORCA Flash4 CMOS digital camera (Hamamatsu) and subjected to deconvolution (CellSens; Olympus). Mitochondrial morphology and nucleoids was visualized using 3D-renderings generated with Imaris® imaging software (Bitplane). Quantitative 3D assessments of mitochondrial morphology and network were performed on ImageJ using MitoAnalyzer plugin (14). Co-localization analyses were performed on Z-stack images of immunostained dissociated islet cells using the Coloc2 plugin on ImageJ. Changes in relative nucleoid size were quantified from 3D deconvolution images of immunostained dissociated islet cells, detected by perinuclear anti-DNA antibody staining, using ImageJ.

### **mtDNA content and replication assays**

Relative mtDNA content by qPCR with SYBR-based detection (Universal SYBR Green Supermix; Biorad) was conducted as previously described (56) following DNA isolation with the Blood/Tissue DNeasy kit (Qiagen) according to manufacturer's protocols. First strand mtDNA replication levels were measured by qPCR following digestion by Mnl I, which site specifically digest double stranded DNA (57). Briefly, primers specific to 7S mtDNA (5'-ACTCTTCTCTTCCATATGACTATCCC-3' and 5'-GGCCCTGAAGTAAGAACCAGATGT-3'), whose amplicon contains a Mnl I site, were used to quantify relative single-stranded mtDNA forming the D-loop. Single-stranded DNA generated from the extension of 7S region was measured using primers specific to CYTB (5'-TGCATACGCCATTCTACGCTCA-3' and 5'-



GTGATTGGGCGGAATATTAGGCTTC-3'), which also contains an Mnl I site. Primers specific to COXI (5'-GCAGGAGCATCAGTAGACCTAACA-3' and 5'-GCGGCTAGCACTGGTAGTGATAAT-3'), whose amplicon does not contain an Mnl I site, were used to quantify non-replicating double stranded mtDNA. The ratio of 7S or CYTB amplicons to the COXI amplicon were then calculated after qPCR of Mnl I digested DNA to determine the relative amount of single stranded mtDNA at the D-loop strand or initiation of first strand replication, respectively.

### **RNA sequencing, differential expression, and functional analysis**

Sequencing was performed by the Advanced Genomics Core at University of Michigan Medical School. Total RNA was isolated and DNase treated using commercially available kits (Omega Biotek and Ambion, respectively). Libraries were constructed and subsequently subjected to 151bp paired-end cycles on the NovaSeq-6000 platform (Illumina). FastQC (v0.11.8) was used to ensure the quality of data. Reads were mapped to the reference genome GRCm38 (ENSEMBL), using STAR (v2.6.1b) and assigned count estimates to genes with RSEM (v1.3.1). Alignment options followed ENCODE standards for RNA-seq. FastQC was used in an additional post-alignment step to ensure that only high-quality data were used for expression quantitation and differential expression. Data were pre-filtered to remove genes with 0 counts in all samples. Differential gene expression analysis was performed using DESeq2, using a negative binomial generalized linear model (thresholds: linear fold change >1.5 or <-1.5, Benjamini-Hochberg FDR ( $P_{adj}$ ) <0.05). Plots were generated using variations of DESeq2 plotting functions and other packages with R version 3.3.3. Genes were annotated with NCBI Entrez GeneIDs and text descriptions. Functional analysis, including candidate pathways activated or inhibited in comparison(s) and GO-term enrichments, was performed using iPathway Guide (Advaita). Primary data deposition at GEO is currently in process.

### **Adenoviral transfection**

Isolated mouse islets were distended with Accutase for 1 min at 37° C as described previously (58). Islets were then transduced with 0.15 MOI of Ad.EV (expressing an empty vector) or

Ad.hTFAM (expressing human-specific TFAM) for 48 hrs (viral particles purchased from Vector Biolabs).  $\beta$ -cell transduction was evaluated on dissociated islet cells by immunostaining with Pdx1 and human-specific TFAM anti-sera.

### **Flow cytometry**

Following isolation and culture, live mouse islets were exposed to 100 nM MtpHagy dye (Dojindo Molecular Technologies) for 3 hours to assess time-dependent accumulation of mitochondria to acidic organelles by the relative fluorescence intensity of the dye per cell as described (59, 60). Islets were then dissociated into single cells, stained with DAPI (Thermo Fisher Scientific) and Fluozin-3 (Thermo Fisher Scientific), and resuspended in phenol red-free islet culture medium as previously described (13). Samples were analyzed on an LSR Fortessa flow cytometer (BD Biosciences). Single cells were gated using forward scatter and side scatter (FSC and SSC, respectively) plots, DAPI staining was used to exclude dead cells, and Fluozin-3 was used to identify  $\beta$ -cells as previously described (13, 61). MtpHagy measurements in  $\beta$ -cells were made using 488 nm excitation laser with a 710 nm emission filter and analyzed using FlowJo (Tree Star Inc.). A total of 5,000  $\beta$ -cells was quantified from each independent islet preparation.

### **Glucose and insulin measurements**

IPGTT, ITT and serum insulin measurements were performed as described previously (53, 54). Static incubation assays were performed on isolated mouse islets for insulin release as previously described (53, 54).

### **Islet isolation and cell culture**

Mouse islets were isolated and cultured as previously described (53, 54). Cell treatments included DMSO (Fisher) and antimycin A (Sigma). Mitofusin agonist treatment included an equimolar mixture of two previously described compounds (0.5  $\mu$ M each; (46)), which were administered for 24 hours (2-{2-[(5-cyclopropyl-4-phenyl-4H-1,2,4-triazol-3-yl)sulfanyl]propanamido}-4H,5H,6H-cyclopenta[b]thiophene-3-carboxamide, CAS# 920868-45-7 and 1-[2-(benzylsulfanyl)ethyl]-3-(2-methylcyclohexyl)urea, CAS# 1007818-44-1; Enamine Ltd.).

## **Western blotting, quantitative PCR, and immunostaining**

All assays were performed as previously described (13, 53, 54).  $\beta$ -cell mass was quantified as previously described (54). Antibodies used for Western blotting and immunostaining are listed in Supplementary Table 1.

## **Statistics**

In all figures, data are presented as means  $\pm$  SEM, and error bars denote SEM. Statistical comparisons were performed using unpaired two-tailed Student's t-tests or one-way ANOVA, followed by Tukey's post-hoc test for multiple comparisons, as appropriate (Prism GraphPad). A *P* value  $< 0.05$  was considered significant.

## **Study approval**

Animal studies were approved by the University of Michigan Institutional Animal Care and Use Committee.

## **Conflict of interest statement**

The authors have declared that no conflict of interest exists.

## **Author Contributions**

V.S. conceived, designed and performed experiments, interpreted results, drafted and reviewed the manuscript. J.Z. conceived, designed and performed experiments, interpreted results, and reviewed the manuscript. G.L.P. and E.C.R. designed and performed experiments and interpreted results. B.A.K. designed studies, interpreted results and reviewed the manuscript. S.A.S. conceived and designed the studies, interpreted results, drafted, edited, and reviewed the manuscript.

## **Acknowledgements**

S.A.S was supported by the JDRF (CDA-2016-189, SRA-2018-539, COE-2019-861), the NIH (R01 DK108921, U01 DK127747), the Department of Veterans Affairs (I01 BX004444), the Brehm family, and the Anthony family. G.L.P. was supported by the American Diabetes Association (19-PDF-063). B.A.K. was supported by the Department of Veterans Affairs (I01 BX004444). The JDRF Career Development Award to S.A.S. is partly supported by the Danish Diabetes Academy and the Novo Nordisk Foundation. We acknowledge the Microscopy, Imaging and Cellular Physiology Core of the University of Michigan DRC (P30 DK020572) for assistance with imaging studies. We thank the University of Michigan Flow Cytometry Core for assistance with flow cytometry studies. Next generation sequencing was carried out in the Advanced Genomics Core at the University of Michigan. We acknowledge support from the Bioinformatics Core of the University of Michigan's Biomedical Research Core Facilities. We thank Drs. K. Claiborn, E. Walker, C. Rutledge, N. Desai, and members of the Soleimanpour laboratory for helpful advice.

## REFERENCES

1. Westermann B. Mitochondrial fusion and fission in cell life and death. *Nat Rev Mol Cell Biol.* 2010;11(12):872-84.
2. Kaufman BA, Li C, and Soleimanpour SA. Mitochondrial regulation of beta-cell function: maintaining the momentum for insulin release. *Molecular aspects of medicine.* 2015;42:91-104.
3. Maechler P. Mitochondrial function and insulin secretion. *Mol Cell Endocrinol.* 2013;379(1-2):12-8.
4. Anello M, Lupi R, Spampinato D, Piro S, Masini M, Boggi U, et al. Functional and morphological alterations of mitochondria in pancreatic beta cells from type 2 diabetic patients. *Diabetologia.* 2005;48(2):282-9.
5. Masini M, Martino L, Marselli L, Bugliani M, Boggi U, Filippini F, et al. Ultrastructural alterations of pancreatic beta cells in human diabetes mellitus. *Diabetes Metab Res Rev.* 2017;33(6).
6. Sebastian D, Palacin M, and Zorzano A. Mitochondrial Dynamics: Coupling Mitochondrial Fitness with Healthy Aging. *Trends Mol Med.* 2017;23(3):201-15.
7. Schrepfer E, and Scorrano L. Mitofusins, from Mitochondria to Metabolism. *Mol Cell.* 2016;61(5):683-94.
8. Liesa M, and Shirihai OS. Mitochondrial dynamics in the regulation of nutrient utilization and energy expenditure. *Cell Metab.* 2013;17(4):491-506.
9. Hennings TG, Chopra DG, DeLeon ER, VanDeusen HR, Sesaki H, Merrins MJ, et al. In Vivo Deletion of beta-Cell Drp1 Impairs Insulin Secretion Without Affecting Islet Oxygen Consumption. *Endocrinology.* 2018;159(9):3245-56.
10. Campbell CT, Kolesar JE, and Kaufman BA. Mitochondrial transcription factor A regulates mitochondrial transcription initiation, DNA packaging, and genome copy number. *Biochim Biophys Acta.* 2012;1819(9-10):921-9.
11. Filograna R, Mennuni M, Alsina D, and Larsson NG. Mitochondrial DNA copy number in human disease: the more the better? *FEBS Lett.* 2020.
12. Twig G, Elorza A, Molina AJ, Mohamed H, Wikstrom JD, Walzer G, et al. Fission and selective fusion govern mitochondrial segregation and elimination by autophagy. *The EMBO journal.* 2008;27(2):433-46.
13. Sidarala V, Pearson GL, Parekh VS, Thompson B, Christen L, Gingerich MA, et al. Mitophagy protects beta cells from inflammatory damage in diabetes. *JCI Insight.* 2020;5(24).
14. Chaudhry A, Shi R, and Luciani DS. A pipeline for multidimensional confocal analysis of mitochondrial morphology, function, and dynamics in pancreatic beta-cells. *Am J Physiol Endocrinol Metab.* 2020;318(2):E87-E101.
15. Mulder H. Transcribing beta-cell mitochondria in health and disease. *Molecular metabolism.* 2017;6(9):1040-51.
16. Silva JP, Kohler M, Graff C, Oldfors A, Magnuson MA, Berggren PO, et al. Impaired insulin secretion and beta-cell loss in tissue-specific knockout mice with mitochondrial diabetes. *Nature genetics.* 2000;26(3):336-40.
17. Chen H, Vermulst M, Wang YE, Chomyn A, Prolla TA, McCaffery JM, et al. Mitochondrial fusion is required for mtDNA stability in skeletal muscle and tolerance of mtDNA mutations. *Cell.* 2010;141(2):280-9.
18. Silva Ramos E, Motori E, Bruser C, Kuhl I, Yeroslaviz A, Ruzzenente B, et al. Mitochondrial fusion is required for regulation of mitochondrial DNA replication. *PLoS Genet.* 2019;15(6):e1008085.

19. Amati-Bonneau P, Valentino ML, Reynier P, Gallardo ME, Bornstein B, Boissiere A, et al. OPA1 mutations induce mitochondrial DNA instability and optic atrophy 'plus' phenotypes. *Brain*. 2008;131(Pt 2):338-51.
20. Kersten S. Physiological regulation of lipoprotein lipase. *Biochim Biophys Acta*. 2014;1841(7):919-33.
21. Haythorne E, Rohm M, van de Bunt M, Brereton MF, Tarasov AI, Blacker TS, et al. Diabetes causes marked inhibition of mitochondrial metabolism in pancreatic beta-cells. *Nat Commun*. 2019;10(1):2474.
22. Gerst F, Jaghutriz BA, Staiger H, Schulte AM, Lorza-Gil E, Kaiser G, et al. The Expression of Aldolase B in Islets Is Negatively Associated With Insulin Secretion in Humans. *J Clin Endocrinol Metab*. 2018;103(12):4373-83.
23. Scarpulla RC. Transcriptional paradigms in mammalian mitochondrial biogenesis and function. *Physiol Rev*. 2008;88(2):611-38.
24. Calvo SE, Clauser KR, and Mootha VK. MitoCarta2.0: an updated inventory of mammalian mitochondrial proteins. *Nucleic Acids Res*. 2016;44(D1):D1251-7.
25. Zhang H, Barcelo JM, Lee B, Kohlhagen G, Zimonjic DB, Popescu NC, et al. Human mitochondrial topoisomerase I. *Proc Natl Acad Sci U S A*. 2001;98(19):10608-13.
26. Ng AC, Baird SD, and Screatton RA. Essential role of TID1 in maintaining mitochondrial membrane potential homogeneity and mitochondrial DNA integrity. *Mol Cell Biol*. 2014;34(8):1427-37.
27. Di Noia MA, Todisco S, Cirigliano A, Rinaldi T, Agrimi G, Iacobazzi V, et al. The human SLC25A33 and SLC25A36 genes of solute carrier family 25 encode two mitochondrial pyrimidine nucleotide transporters. *J Biol Chem*. 2014;289(48):33137-48.
28. Zurita Rendon O, and Shoubridge EA. LONP1 Is Required for Maturation of a Subset of Mitochondrial Proteins, and Its Loss Elicits an Integrated Stress Response. *Mol Cell Biol*. 2018;38(20).
29. Venkatesh S, Lee J, Singh K, Lee I, and Suzuki CK. Multitasking in the mitochondrion by the ATP-dependent Lon protease. *Biochim Biophys Acta*. 2012;1823(1):56-66.
30. Lu B, Yadav S, Shah PG, Liu T, Tian B, Puksza S, et al. Roles for the human ATP-dependent Lon protease in mitochondrial DNA maintenance. *J Biol Chem*. 2007;282(24):17363-74.
31. Sebastian D, Sorianello E, Segales J, Irazoki A, Ruiz-Bonilla V, Sala D, et al. Mfn2 deficiency links age-related sarcopenia and impaired autophagy to activation of an adaptive mitophagy pathway. *The EMBO journal*. 2016;35(15):1677-93.
32. Ma H, Lee Y, Hayama T, Van Dyken C, Marti-Gutierrez N, Li Y, et al. Germline and somatic mtDNA mutations in mouse aging. *PLoS One*. 2018;13(7):e0201304.
33. Matsushima Y, Goto Y, and Kaguni LS. Mitochondrial Lon protease regulates mitochondrial DNA copy number and transcription by selective degradation of mitochondrial transcription factor A (TFAM). *Proc Natl Acad Sci U S A*. 2010;107(43):18410-5.
34. Lu B, Lee J, Nie X, Li M, Morozov YI, Venkatesh S, et al. Phosphorylation of human TFAM in mitochondria impairs DNA binding and promotes degradation by the AAA+ Lon protease. *Mol Cell*. 2013;49(1):121-32.
35. Gensler S, Weber K, Schmitt WE, Perez-Martos A, Enriquez JA, Montoya J, et al. Mechanism of mammalian mitochondrial DNA replication: import of mitochondrial transcription factor A into isolated mitochondria stimulates 7S DNA synthesis. *Nucleic Acids Res*. 2001;29(17):3657-63.
36. Pohjoismaki JL, and Goffart S. Of circles, forks and humanity: Topological organisation and replication of mammalian mitochondrial DNA. *Bioessays*. 2011;33(4):290-9.
37. Gustafson MA, Sullivan ED, and Copeland WC. Consequences of compromised mitochondrial genome integrity. *DNA Repair (Amst)*. 2020;93:102916.



38. Tan K, Fujimoto M, Takii R, Takaki E, Hayashida N, and Nakai A. Mitochondrial SSBP1 protects cells from proteotoxic stresses by potentiating stress-induced HSF1 transcriptional activity. *Nat Commun*. 2015;6:6580.
39. Kasashima K, Sumitani M, and Endo H. Human mitochondrial transcription factor A is required for the segregation of mitochondrial DNA in cultured cells. *Exp Cell Res*. 2011;317(2):210-20.
40. West AP, Khoury-Hanold W, Staron M, Tal MC, Pineda CM, Lang SM, et al. Mitochondrial DNA stress primes the antiviral innate immune response. *Nature*. 2015;520(7548):553-7.
41. Guo S, Dai C, Guo M, Taylor B, Harmon JS, Sander M, et al. Inactivation of specific beta cell transcription factors in type 2 diabetes. *J Clin Invest*. 2013;123(8):3305-16.
42. Ishida E, Kim-Muller JY, and Accili D. Pair Feeding, but Not Insulin, Phloridzin, or Rosiglitazone Treatment, Curtails Markers of beta-Cell Dedifferentiation in db/db Mice. *Diabetes*. 2017;66(8):2092-101.
43. Li J, Du H, Zhang M, Zhang Z, Teng F, Zhao Y, et al. Amorphous solid dispersion of Berberine mitigates apoptosis via iPLA2beta/Cardiolipin/Opa1 pathway in db/db mice and in Palmitate-treated MIN6 beta-cells. *Int J Biol Sci*. 2019;15(7):1533-45.
44. Liu J, Chen Z, Zhang Y, Zhang M, Zhu X, Fan Y, et al. Rhein protects pancreatic beta-cells from dynamin-related protein-1-mediated mitochondrial fission and cell apoptosis under hyperglycemia. *Diabetes*. 2013;62(11):3927-35.
45. Zhao Z, Zhang X, Zhao C, Choi J, Shi J, Song K, et al. Protection of pancreatic beta-cells by group VIA phospholipase A(2)-mediated repair of mitochondrial membrane peroxidation. *Endocrinology*. 2010;151(7):3038-48.
46. Rocha AG, Franco A, Krezel AM, Rumsey JM, Alberti JM, Knight WC, et al. MFN2 agonists reverse mitochondrial defects in preclinical models of Charcot-Marie-Tooth disease type 2A. *Science*. 2018;360(6386):336-41.
47. Pommier Y, Sun Y, Huang SN, and Nitiss JL. Roles of eukaryotic topoisomerases in transcription, replication and genomic stability. *Nat Rev Mol Cell Biol*. 2016;17(11):703-21.
48. Zhang Z, Wakabayashi N, Wakabayashi J, Tamura Y, Song WJ, Sereda S, et al. The dynamin-related GTPase Opa1 is required for glucose-stimulated ATP production in pancreatic beta cells. *Mol Biol Cell*. 2011;22(13):2235-45.
49. Miret-Casals L, Sebastian D, Brea J, Rico-Leo EM, Palacin M, Fernandez-Salguero PM, et al. Identification of New Activators of Mitochondrial Fusion Reveals a Link between Mitochondrial Morphology and Pyrimidine Metabolism. *Cell Chem Biol*. 2018;25(3):268-78 e4.
50. Chen H, McCaffery JM, and Chan DC. Mitochondrial fusion protects against neurodegeneration in the cerebellum. *Cell*. 2007;130(3):548-62.
51. Thorens B, Tarussio D, Maestro MA, Rovira M, Heikkila E, and Ferrer J. Ins1(Cre) knock-in mice for beta cell-specific gene recombination. *Diabetologia*. 2015;58(3):558-65.
52. Taddeo EP, Stiles L, Sereda S, Ritou E, Wolf DM, Abdullah M, et al. Individual islet respirometry reveals functional diversity within the islet population of mice and human donors. *Molecular metabolism*. 2018;16:150-9.
53. Pearson G, Chai B, Vozheiko T, Liu X, Kandarpa M, Piper RC, et al. Clec16a, Nrdp1, and USP8 Form a Ubiquitin-Dependent Tripartite Complex That Regulates beta-Cell Mitophagy. *Diabetes*. 2018;67(2):265-77.
54. Soleimanpour SA, Gupta A, Bakay M, Ferrari AM, Groff DN, Fadista J, et al. The diabetes susceptibility gene Clec16a regulates mitophagy. *Cell*. 2014;157(7):1577-90.
55. Soleimanpour SA, Crutchlow MF, Ferrari AM, Raum JC, Groff DN, Rankin MM, et al. Calcineurin signaling regulates human islet {beta}-cell survival. *J Biol Chem*. 2010;285(51):40050-9.

56. Kolesar JE, Wang CY, Taguchi YV, Chou SH, and Kaufman BA. Two-dimensional intact mitochondrial DNA agarose electrophoresis reveals the structural complexity of the mammalian mitochondrial genome. *Nucleic Acids Res.* 2013;41(4):e58.
57. Karamanlidis G, Nascimben L, Couper GS, Shekar PS, del Monte F, and Tian R. Defective DNA replication impairs mitochondrial biogenesis in human failing hearts. *Circ Res.* 2010;106(9):1541-8.
58. Reissaus CA, Pineros AR, Twigg AN, Orr KS, Conteh AM, Martinez MM, et al. A Versatile, Portable Intravital Microscopy Platform for Studying Beta-cell Biology In Vivo. *Sci Rep.* 2019;9(1):8449.
59. Iwashita H, Torii S, Nagahora N, Ishiyama M, Shioji K, Sasamoto K, et al. Live Cell Imaging of Mitochondrial Autophagy with a Novel Fluorescent Small Molecule. *ACS Chem Biol.* 2017;12(10):2546-51.
60. Konig J, Ott C, Hugo M, Jung T, Bulteau AL, Grune T, et al. Mitochondrial contribution to lipofuscin formation. *Redox Biol.* 2017;11:673-81.
61. Jayaraman S. A novel method for the detection of viable human pancreatic beta cells by flow cytometry using fluorophores that selectively detect labile zinc, mitochondrial membrane potential and protein thiols. *Cytometry A.* 2008;73(7):615-25.



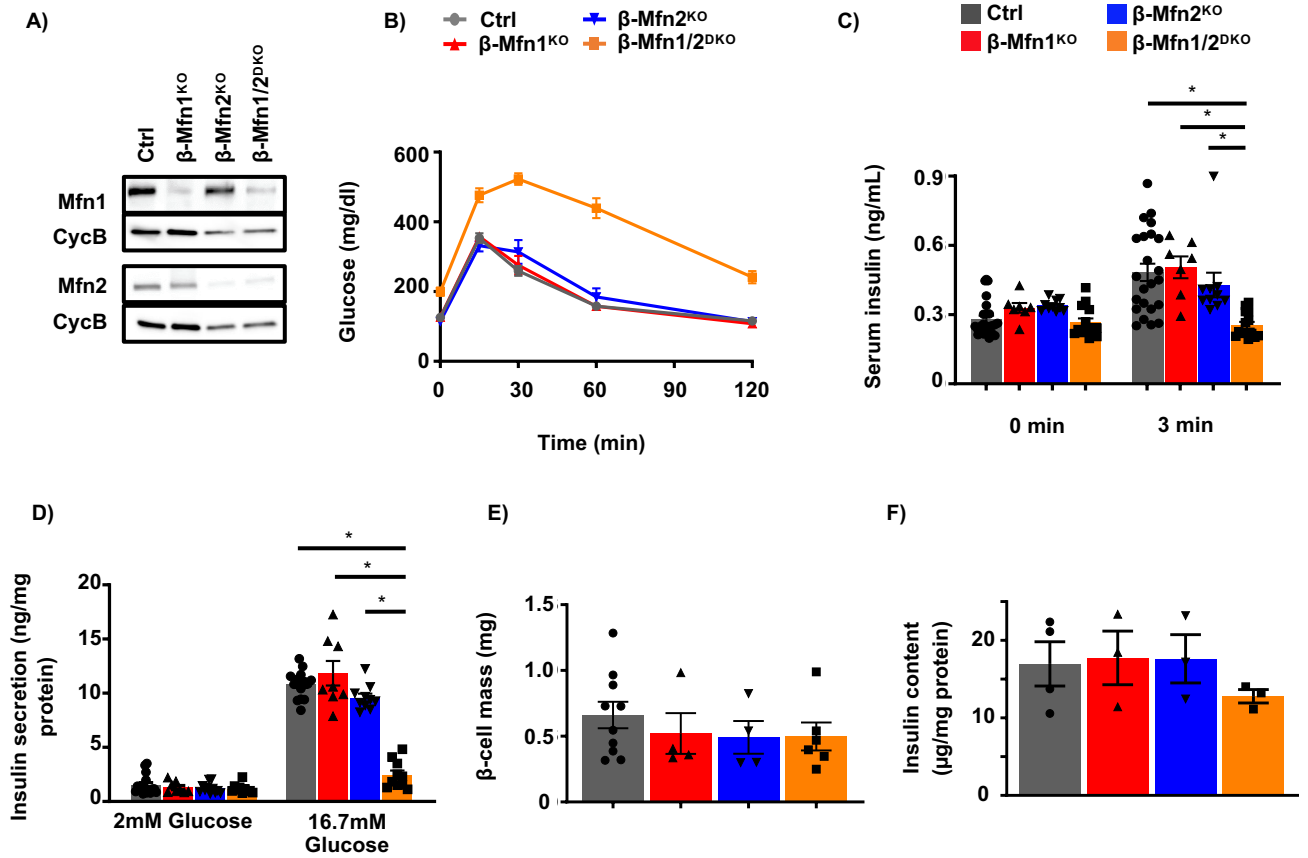

**Figure 1. Loss of both Mfn1 and Mfn2 in  $\beta$ -cells impairs glucose tolerance and glucose-stimulated insulin release.**

**(A)** Expression of Mfn1 and Mfn2 by Western blot (WB) in islets isolated from 8-10-week-old Ctrl,  $\beta$ -Mfn1<sup>KO</sup>,  $\beta$ -Mfn2<sup>KO</sup> and  $\beta$ -Mfn1/2<sup>DKO</sup> mice. Vinculin serves as a loading control. Representative of 4 independent mice/group. **(B)** Blood glucose concentrations measured during IPGTT of 8-week-old Ctrl,  $\beta$ -Mfn1<sup>KO</sup>,  $\beta$ -Mfn2<sup>KO</sup> and  $\beta$ -Mfn1/2<sup>DKO</sup> littermates.  $n=6-28$ /group. ( $p<0.05$  by ANOVA for  $\beta$ -Mfn1/2<sup>DKO</sup> mice vs Ctrl). **(C)** Serum insulin concentrations ( $n=7-24$ /group) measured during *in vivo* glucose-stimulated insulin release testing in 8-week-old Ctrl,  $\beta$ -Mfn1<sup>KO</sup>,  $\beta$ -Mfn2<sup>KO</sup> and  $\beta$ -Mfn1/2<sup>DKO</sup> littermates. \* $p<0.05$  by ANOVA. **(D)** Glucose-stimulated insulin secretion following static incubations in 2mM and 16.7 mM glucose performed in isolated islets of 8-week-old Ctrl,  $\beta$ -Mfn1<sup>KO</sup>,  $\beta$ -Mfn2<sup>KO</sup> and  $\beta$ -Mfn1/2<sup>DKO</sup> littermates.  $n=8-16$ /group. \* $p<0.05$  by ANOVA. **(E)** Pancreatic  $\beta$ -cell mass ( $n=4-10$ /group) measured in 10-week-old Ctrl,  $\beta$ -Mfn1<sup>KO</sup>,  $\beta$ -Mfn2<sup>KO</sup> and  $\beta$ -Mfn1/2<sup>DKO</sup> littermates. **(F)** Islet insulin content normalized to total protein ( $n=3-4$ /group) measured in 10-week-old Ctrl,  $\beta$ -Mfn1<sup>KO</sup>,  $\beta$ -Mfn2<sup>KO</sup> and  $\beta$ -Mfn1/2<sup>DKO</sup> littermates.

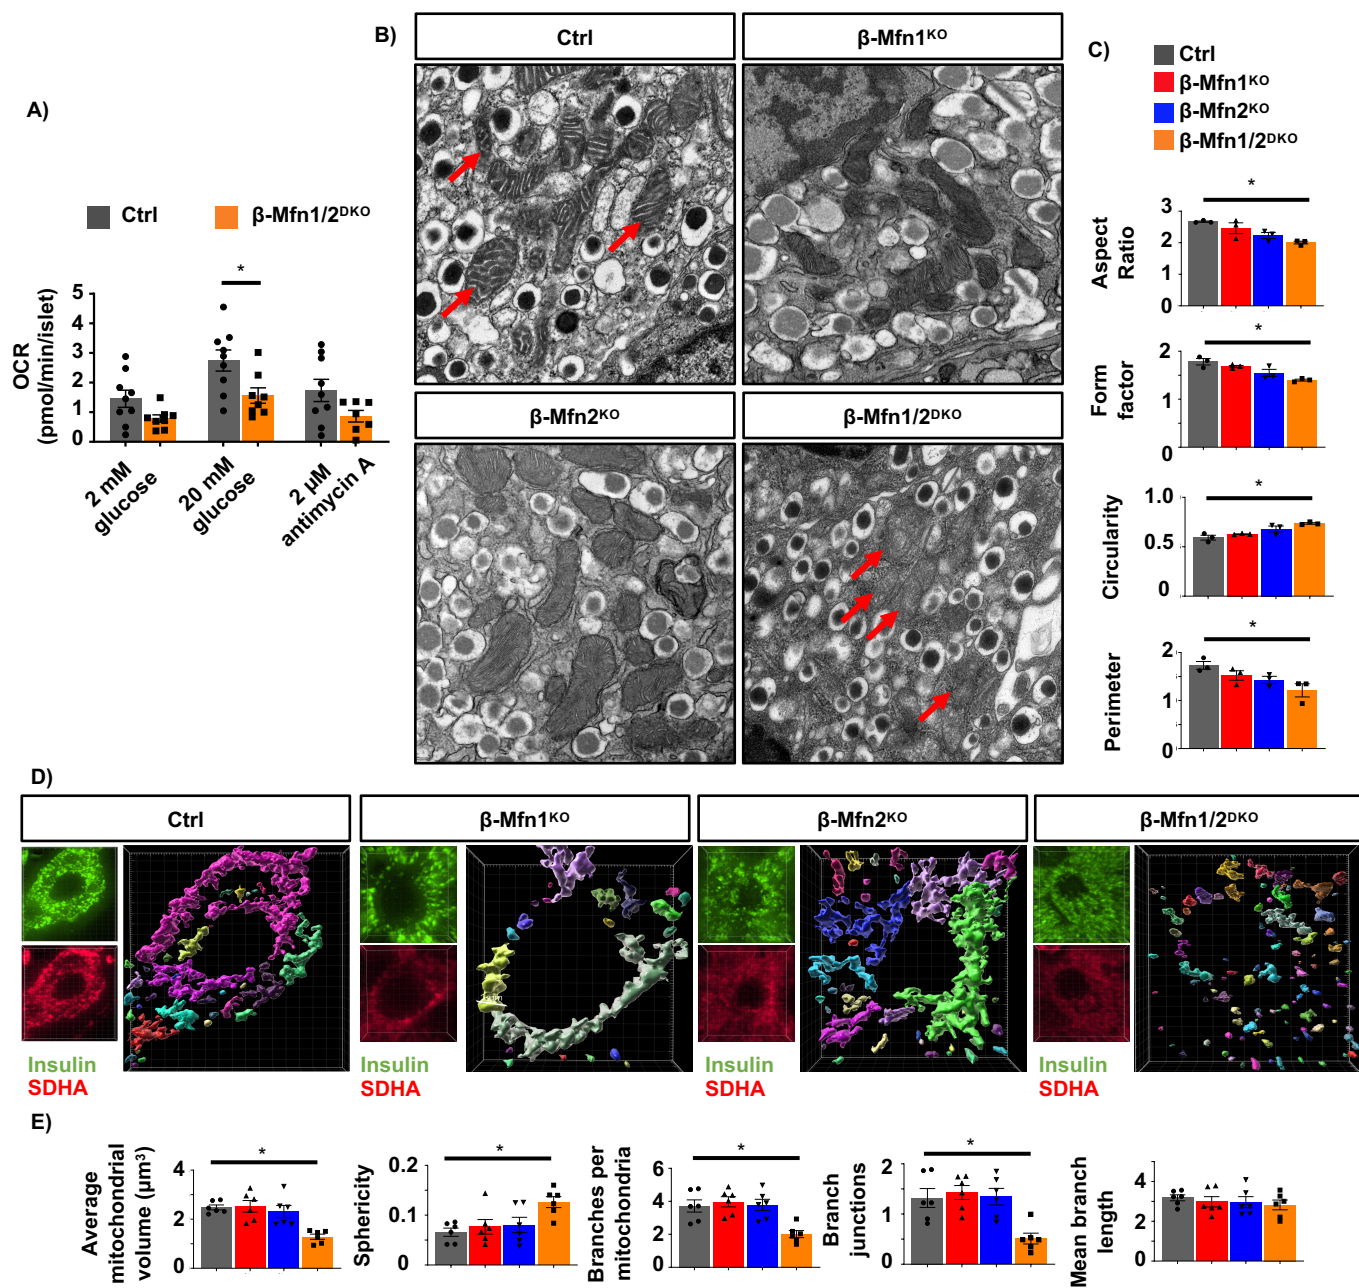

**Figure 2. Combined Mfn1 and Mfn2 deficiency reduces mitochondrial respiration and leads to mitochondrial fragmentation in  $\beta$ -cells.**

**(A)** OCR measured following exposure to 2mM glucose, 20mM glucose, and 2 $\mu$ M antimycin A in islets isolated from 8-10-week-old Ctrl and  $\beta$ -Mfn1/2<sup>DKO</sup> mice by a Seahorse flux analyzer. n=8-9/group. \*p<0.05 by ANOVA. **(B)** Representative transmission EM images of  $\beta$ -cells from 12-week-old Ctrl,  $\beta$ -Mfn1<sup>KO</sup>,  $\beta$ -Mfn2<sup>KO</sup> and  $\beta$ -Mfn1/2<sup>DKO</sup> littermates. n=3/group. Mitochondria are highlighted with red arrows. **(C)** Quantification of mitochondrial morphology in Ctrl,  $\beta$ -Mfn1<sup>KO</sup>,  $\beta$ -Mfn2<sup>KO</sup> and  $\beta$ -Mfn1/2<sup>DKO</sup>  $\beta$ -cells from transmission EM images (~125 independent mitochondria scored/animal). n=3/group. \*p<0.05 by ANOVA. **(D)** Imaris® generated three-dimensional reconstruction of deconvolution immunofluorescence Z-stack images at 100X magnification stained for SDHA (see inset image – red) from pancreatic sections of Ctrl,  $\beta$ -Mfn1<sup>KO</sup>,  $\beta$ -Mfn2<sup>KO</sup> and  $\beta$ -Mfn1/2<sup>DKO</sup> mice.  $\beta$ -cells were identified by insulin co-staining (inset: insulin – green). Each unique color represents a separate  $\beta$ -cell mitochondrial network cluster. Representative image of 6 independent mice/group. **(E)**  $\beta$ -cell mitochondrial morphology and network analysis of confocal immunofluorescence Z-stack images from studies depicted in Figure 2D, stained for SDHA (and insulin) from pancreatic sections of Ctrl,  $\beta$ -Mfn1<sup>KO</sup>,  $\beta$ -Mfn2<sup>KO</sup> and  $\beta$ -Mfn1/2<sup>DKO</sup> mice by MitoAnalyzer. n=6/group (~150  $\beta$ -cells/animal were quantified). \*p<0.05 by ANOVA.

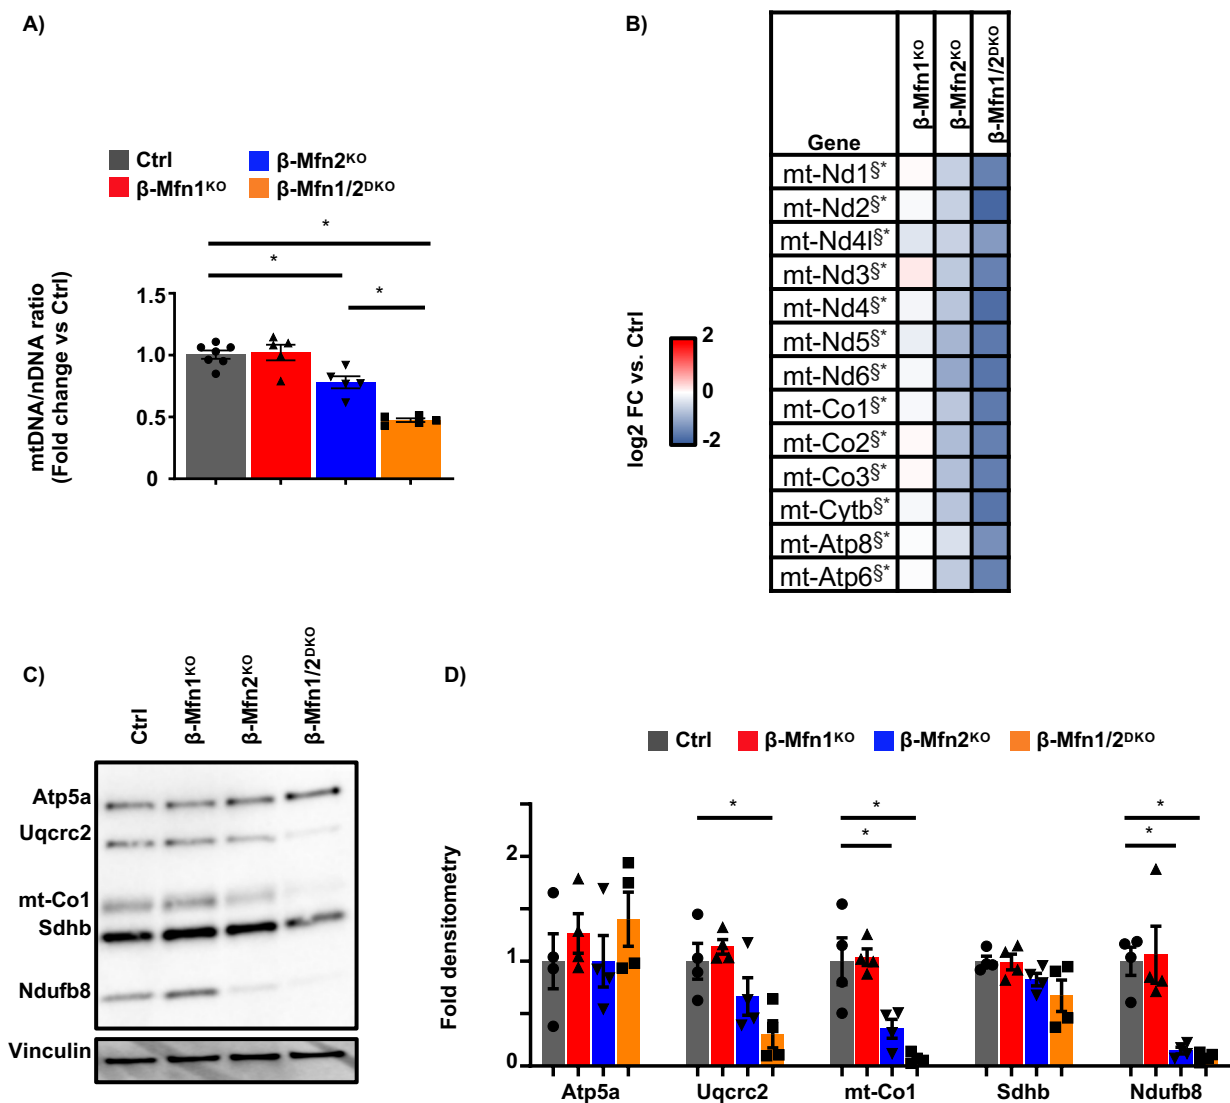

**Figure 3. Mfn1/2-deficient  $\beta$ -cells exhibit reduced mtDNA content.**

(A) Relative mtDNA content measured by qPCR (normalized to nuclear DNA expression) in isolated islets of 8-week-old Ctrl,  $\beta$ -Mfn1<sup>KO</sup>,  $\beta$ -Mfn2<sup>KO</sup> and  $\beta$ -Mfn1/2<sup>DKO</sup> littermates. n=5-7/group. \*p<0.05 by ANOVA. (B) Heatmap representing relative expression (compared to littermate controls; Ctrl) of mitochondrial encoded transcripts in islets isolated from  $\beta$ -Mfn1<sup>KO</sup>,  $\beta$ -Mfn2<sup>KO</sup> and  $\beta$ -Mfn1/2<sup>DKO</sup> mice. n=4-6/group. <sup>S\*</sup> Benjamini-Hochberg FDR (Padj) <0.05 comparing  $\beta$ -Mfn2<sup>KO</sup>(<sup>S</sup>) and  $\beta$ -Mfn1/2<sup>DKO</sup>(<sup>\*</sup>) to Ctrl. (C) Expression of OXPHOS subunit proteins by WB in islets isolated from 8-10-week-old Ctrl,  $\beta$ -Mfn1<sup>KO</sup>,  $\beta$ -Mfn2<sup>KO</sup> and  $\beta$ -Mfn1/2<sup>DKO</sup> mice. Representative of 4 independent mice/group. (D) OXPHOS subunit densitometry (normalized to Vinculin) from studies in Figure 3C. n=4/group; \*p<0.05 by ANOVA.

A)

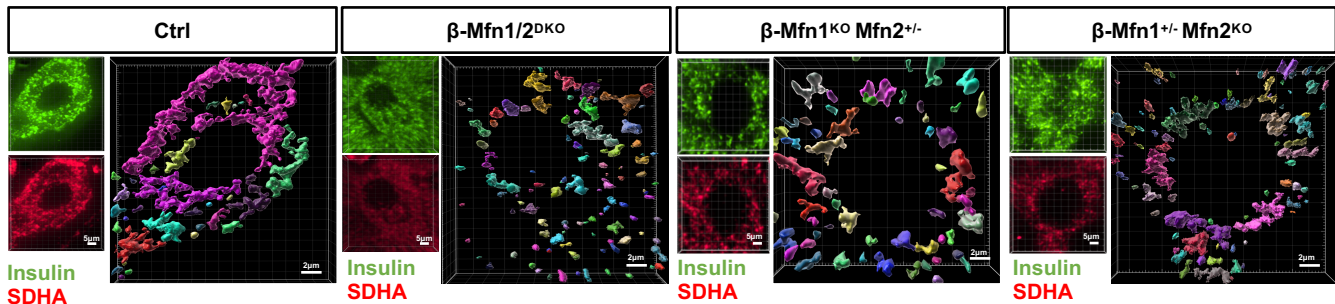

B)

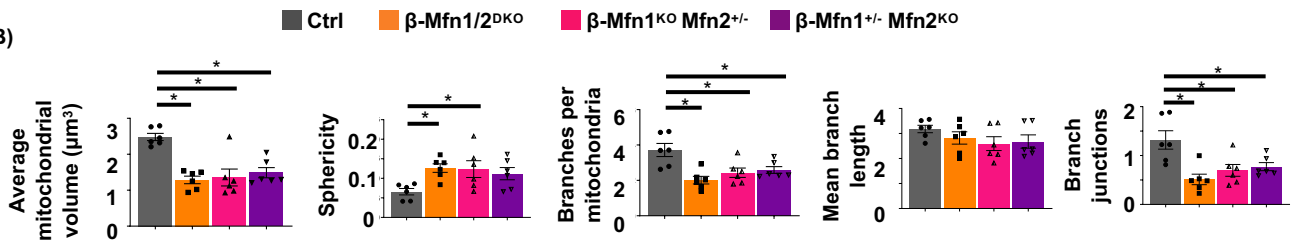

C)

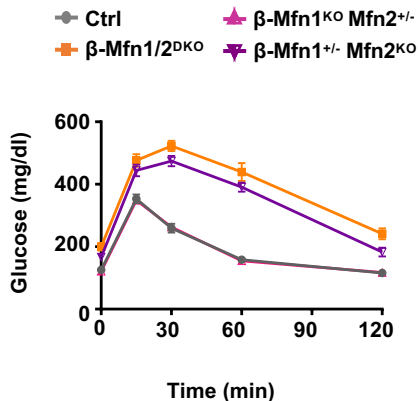

D)

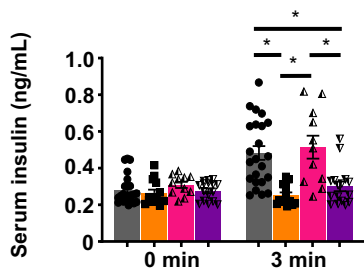

E)

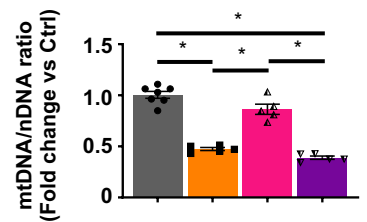

**Figure 4. A single allele of *Mfn2*, but not *Mfn1*, maintains glycemic control by preserving  $\beta$ -cell mtDNA content despite mitochondrial fragmentation.**

**(A)** Imaris® generated three-dimensional reconstruction of deconvolution immunofluorescence Z-stack images at 100X magnification stained for SDHA (see inset image – red) from pancreatic sections of Ctrl,  $\beta$ -Mfn1/2<sup>DKO</sup>,  $\beta$ -Mfn1<sup>+/-</sup>Mfn2<sup>KO</sup>, and  $\beta$ -Mfn1<sup>KO</sup>Mfn2<sup>+/-</sup> mice.  $\beta$ -cells were identified by insulin co-staining (inset: insulin – green). Each unique color represents a separate  $\beta$ -cell mitochondrial network cluster. Representative image of 6 independent mice/group. **(B)**  $\beta$ -cell mitochondrial morphology and network analysis of deconvolution immunofluorescence Z-stack images from pancreatic sections stained for insulin and SDHA of Ctrl,  $\beta$ -Mfn1/2<sup>DKO</sup>,  $\beta$ -Mfn1<sup>+/-</sup>Mfn2<sup>KO</sup>, and  $\beta$ -Mfn1<sup>KO</sup>Mfn2<sup>+/-</sup> mice by MitoAnalyzer. n=6/group (50-200  $\beta$ -cells/animal were quantified). \*p<0.05 by ANOVA. **(C)** Blood glucose concentrations measured during IPGTT of 8-week-old Ctrl,  $\beta$ -Mfn1/2<sup>DKO</sup>,  $\beta$ -Mfn1<sup>+/-</sup>Mfn2<sup>KO</sup>, and  $\beta$ -Mfn1<sup>KO</sup>Mfn2<sup>+/-</sup> littermates. n=13-28/group. (p<0.05 by ANOVA for  $\beta$ -Mfn1<sup>+/-</sup>Mfn2<sup>KO</sup> and  $\beta$ -Mfn1/2<sup>DKO</sup> mice vs Ctrl). **(D)** Serum insulin concentrations (n=11-24/group) measured during *in vivo* glucose-stimulated insulin release testing in 8-week-old Ctrl,  $\beta$ -Mfn1/2<sup>DKO</sup>,  $\beta$ -Mfn1<sup>+/-</sup>Mfn2<sup>KO</sup>, and  $\beta$ -Mfn1<sup>KO</sup>Mfn2<sup>+/-</sup> littermates. \*p<0.05 by ANOVA. **(E)** Relative mtDNA content measured by qPCR (normalized to nuclear DNA expression) in isolated islets of 8-week-old Ctrl,  $\beta$ -Mfn1/2<sup>DKO</sup>,  $\beta$ -Mfn1<sup>+/-</sup>Mfn2<sup>KO</sup>, and  $\beta$ -Mfn1<sup>KO</sup>Mfn2<sup>+/-</sup> littermates. n=5-7/group. \*p<0.05 by ANOVA. Of note, studies in Ctrl and  $\beta$ -Mfn1/2<sup>DKO</sup> mice were performed together alongside all  $\beta$ -Mfn1<sup>KO</sup>,  $\beta$ -Mfn2<sup>KO</sup>,  $\beta$ -Mfn1<sup>+/-</sup>Mfn2<sup>KO</sup>, and  $\beta$ -Mfn1<sup>KO</sup>Mfn2<sup>+/-</sup> littermates and thus appear twice for purposes of relevant comparisons (in Figures 1B, 1C, 2D, 2E, 3A and again in Figures 4A-E).

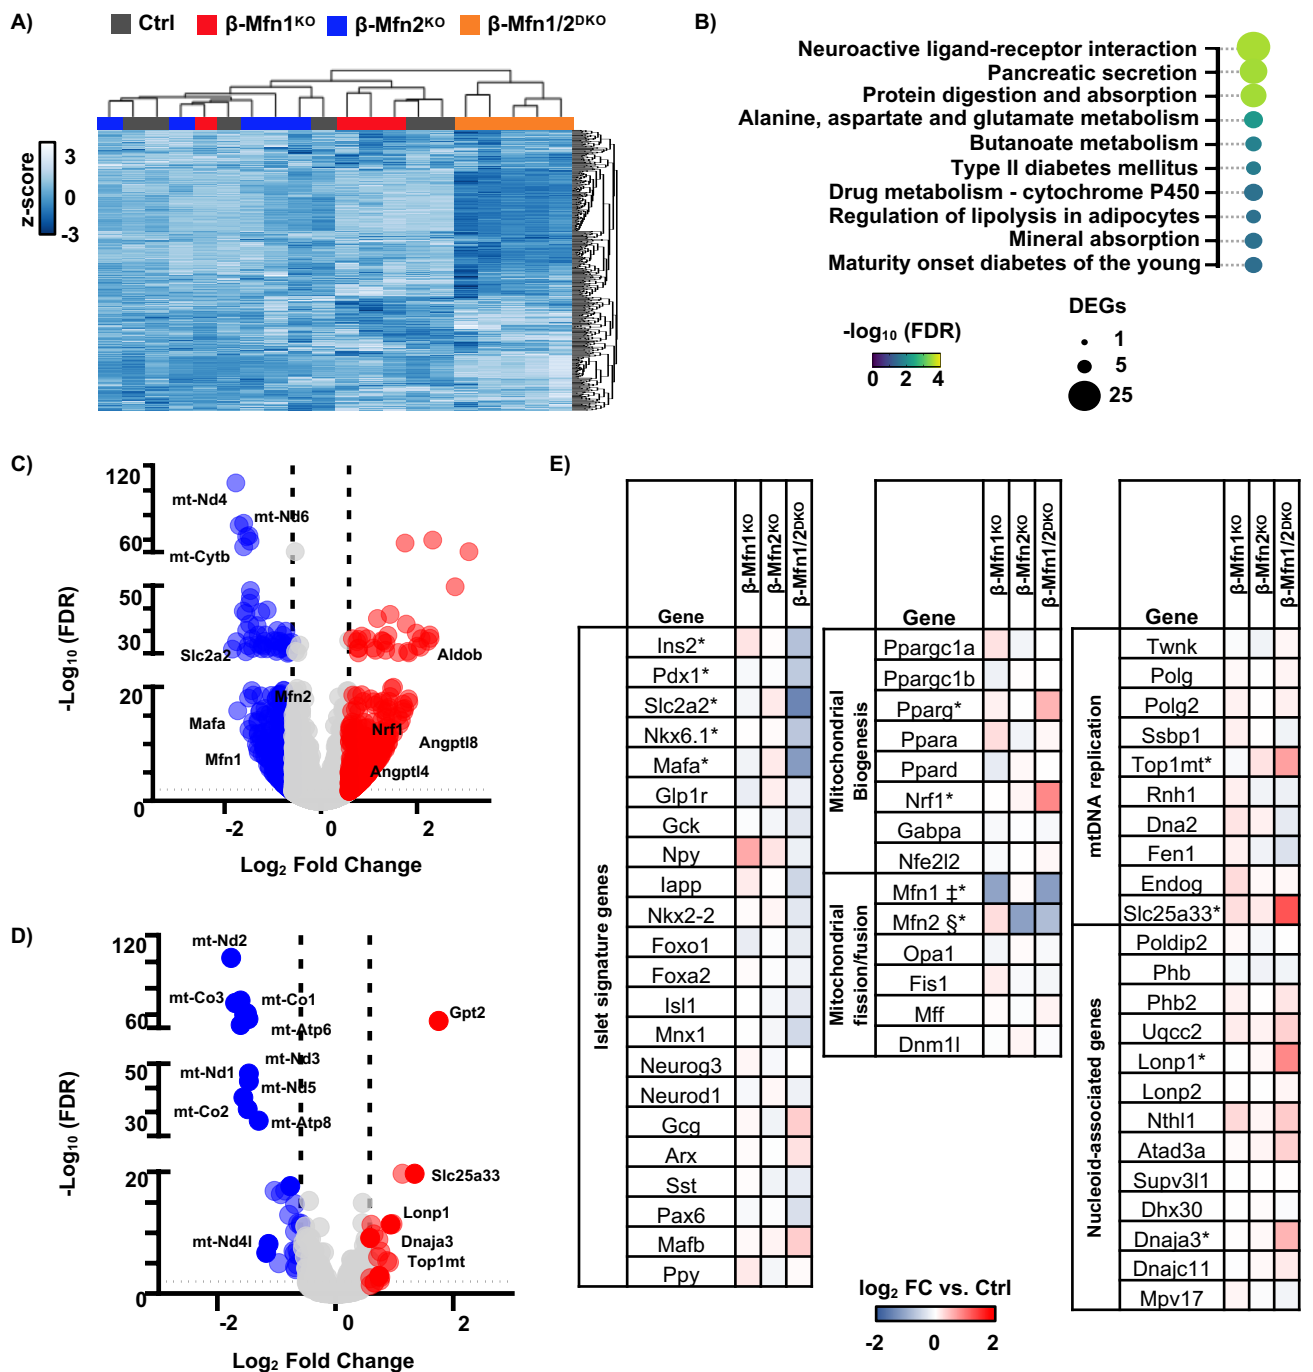

**Figure 5. Mfn1/2-deficiency induces expression of genes associated with mtDNA replication.**

(A) Hierarchical clustering of RNAseq samples displaying the 500 genes with the highest mean expression in islets of 12-week-old mice.  $n=4-6/\text{group}$ . (B) Pathway analysis of top differentially regulated pathways in  $\beta$ -Mfn1/2<sup>DKO</sup> islets compared to littermate Ctrl islets, demarcated by both false discovery rate (FDR) and the number of significantly differentially expressed genes (DEGs) per pathway.  $n=4-6/\text{group}$ . (C) Volcano plot depicting differential RNA expression in islets of  $\beta$ -Mfn1/2<sup>DKO</sup> mice compared to littermate Ctrl mice. Significantly differentially expressed genes demarcated by  $-\log_{10} \text{FDR} > \text{or} < 2$  and  $\log_2 \text{fold change (FC)} > \text{or} < 0.6$ .  $n=4-6/\text{group}$ . (D) Volcano plot depicting differential RNA expression of MitoCarta 2.0 targets in islets of  $\beta$ -Mfn1/2<sup>DKO</sup> mice compared to littermate Ctrl mice. Significantly differentially expressed genes demarcated by  $-\log_{10} \text{FDR} > \text{or} < 2$  and  $\log_2 \text{fold change (FC)} > \text{or} < 0.6$ .  $n=4-6/\text{group}$ . (E) Differential RNA expression heatmap of selected genes from islets of  $\beta$ -Mfn1<sup>KO</sup>,  $\beta$ -Mfn2<sup>KO</sup> and  $\beta$ -Mfn1/2<sup>DKO</sup> mice compared to littermate Ctrl mice. up. ‡§\* Benjamini-Hochberg FDR (Padj)  $< 0.05$  comparing  $\beta$ -Mfn1<sup>KO</sup>(‡),  $\beta$ -Mfn2<sup>KO</sup>(§) and  $\beta$ -Mfn1/2<sup>DKO</sup>(\*) to Ctrl.  $n=4-6/\text{group}$ .



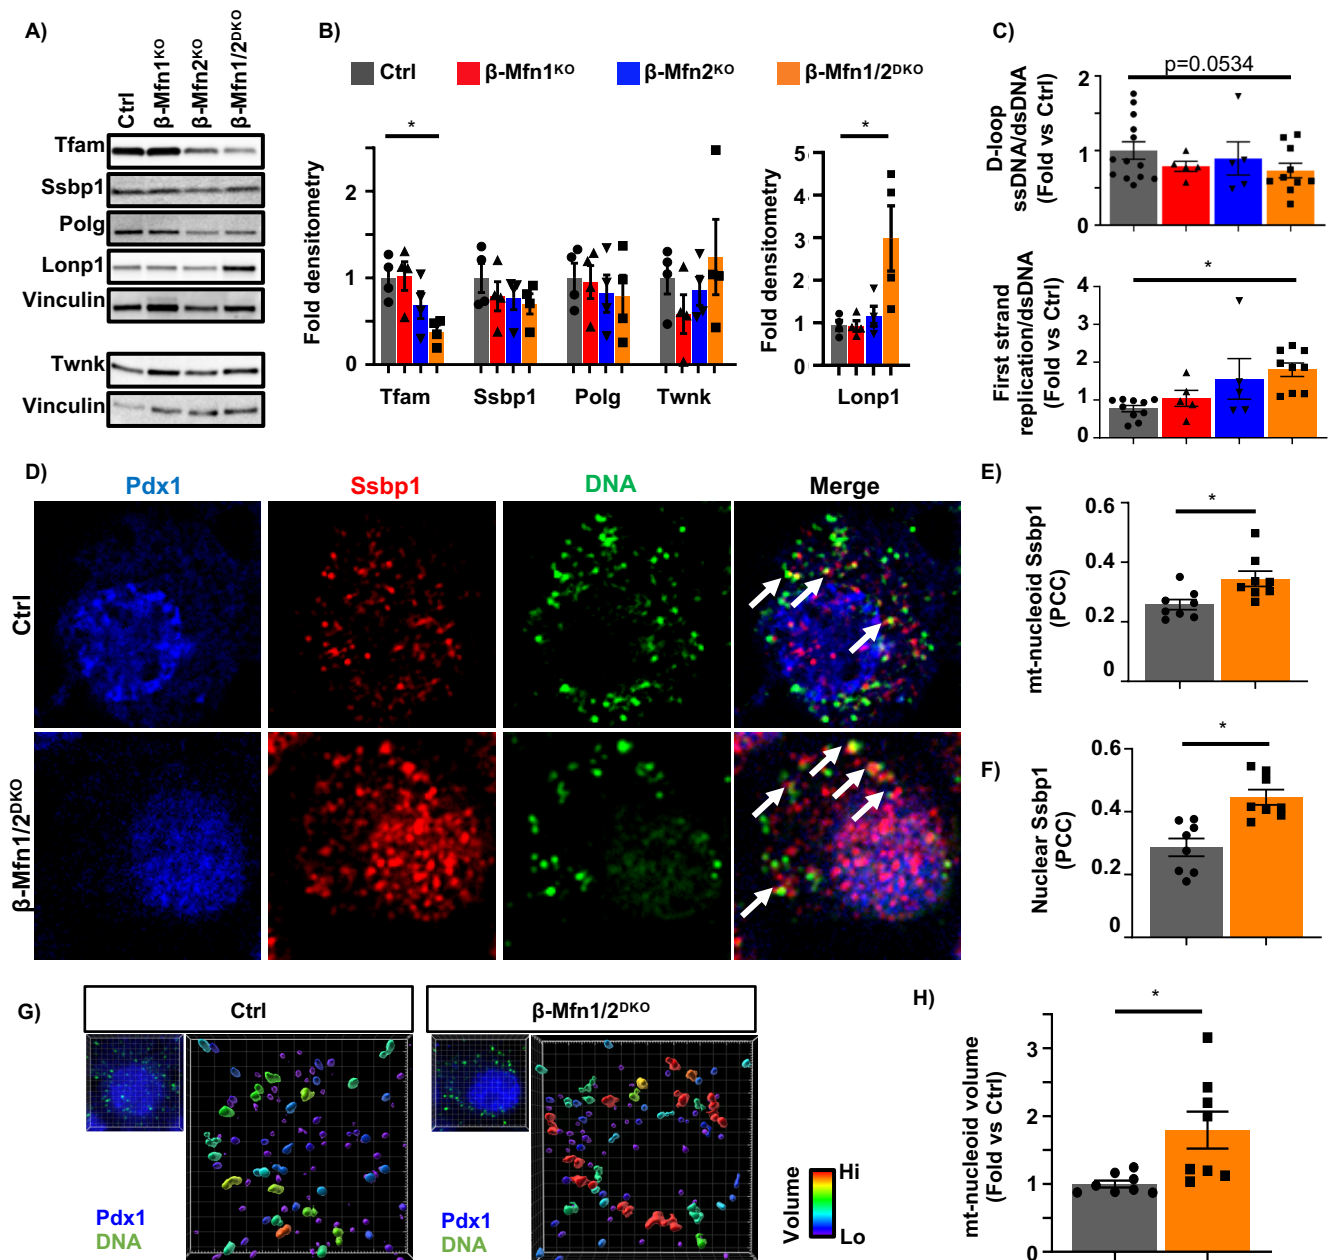

**Figure 6. Mfn1 and 2 maintain expression of Tfam in  $\beta$ -cells.**

(A) Expression of Tfam, key replisome proteins, and LonP1 by Western blot (WB) in islets isolated from 11-week-old Ctrl,  $\beta$ -Mfn1<sup>KO</sup>,  $\beta$ -Mfn2<sup>KO</sup> and  $\beta$ -Mfn1/2<sup>DKO</sup> mice. Representative of 4 independent mice per group. (B) Densitometry (normalized to Vinculin) from studies in Figure 6A. n=4/group; \*p<0.05 by ANOVA. (C) Quantification of single strand mtDNA products measured by qPCR in isolated islets from 8-week-old Ctrl,  $\beta$ -Mfn1<sup>KO</sup>,  $\beta$ -Mfn2<sup>KO</sup> and  $\beta$ -Mfn1/2<sup>DKO</sup> littermates. n=5-13/group. \*p<0.05 by ANOVA. (D) Deconvolution immunofluorescence image at 100X magnification of islets from Ctrl and  $\beta$ -Mfn1/2<sup>DKO</sup> mice stained for Ssbp1 (red), mtDNA (green), and Pdx1 (blue). Representative of 8 independent experiments. White arrows demarcate co-localized Ssbp1+ mtDNA+ structures. (E) Quantification of mitochondrial nucleoid Ssbp1 localization (Ssbp1+ mtDNA+ co-localization) in Ctrl and  $\beta$ -Mfn1/2<sup>DKO</sup>  $\beta$ -cells from studies depicted in Figure 6D by Pearson's correlation coefficient (PCC). n=8/group. \*p<0.05 by two-tailed t-test. (~100  $\beta$ -cells from each animal per group were analyzed). (F) Quantification of nuclear Ssbp1 localization in Ctrl and  $\beta$ -Mfn1/2<sup>DKO</sup>  $\beta$ -cells from studies depicted in Figure 6D by Pearson's correlation coefficient (PCC). n=8/group. \*p<0.05 by two-tailed t-test. (~100  $\beta$ -cells from each animal per group were analyzed). (G) Imaris® generated 3D reconstruction of deconvolution immunofluorescence Z-stack images at 100X magnification stained for DNA of  $\beta$ -cells (see inset image – Pdx1, blue, DNA, green) from Ctrl and  $\beta$ -Mfn1/2<sup>DKO</sup> mice. Colors represent relative mitochondrial volume. Representative image of 8 independent mice/group. (H) Quantification of relative nucleoid volume of Ctrl and  $\beta$ -Mfn1/2<sup>DKO</sup>  $\beta$ -cells from studies depicted in Figure 6G. n=8/group. \*p<0.05 by two-tailed t-test. (~100  $\beta$ -cells from each animal per group were analyzed).

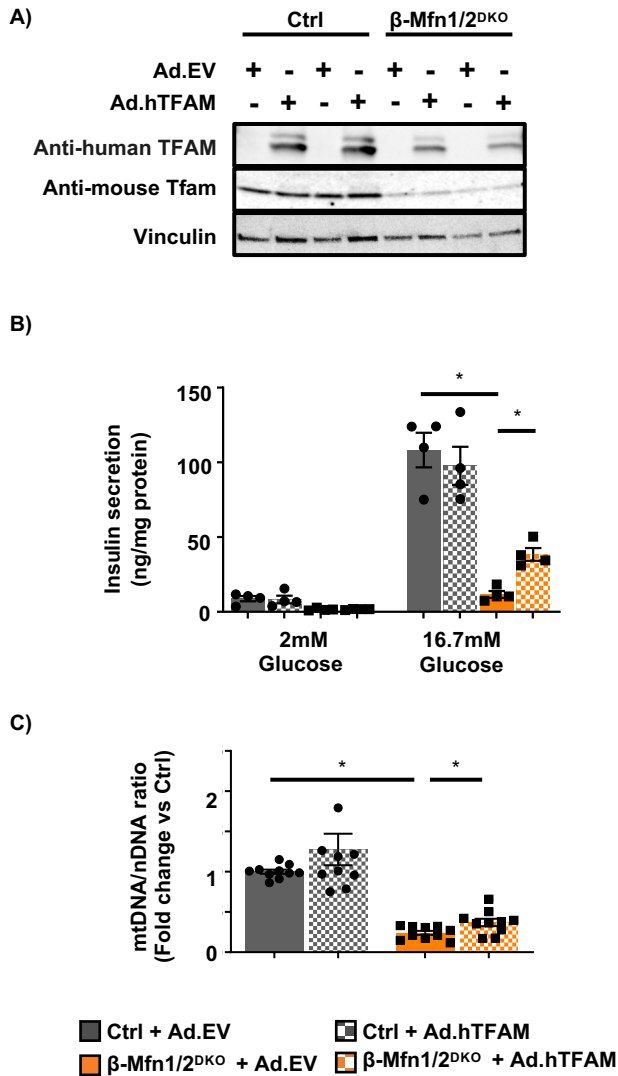

**Figure 7. Mfn1 and 2 maintain  $\beta$ -cell function through Tfam-mediated mtDNA copy number control.**

**(A)** Expression of mouse-specific Tfam and human-specific TFAM by WB in islets isolated from 10-15-week-old Ctrl and  $\beta$ -Mfn1/2<sup>DKO</sup> mice, transduced with empty vector control (Ad.EV) or human TFAM-overexpressing (Ad.hTFAM) adenoviral particles. Representative of 4 independent mice/group. **(B)** Glucose-stimulated insulin secretion following static incubations in 2mM and 16.7 mM glucose performed in isolated Ctrl and  $\beta$ -Mfn1/2<sup>DKO</sup> islets following transduction with Ad.EV or Ad.hTFAM adenoviral particles. n=4/group. \*p<0.05 by ANOVA. **(C)** Relative mtDNA content measured by qPCR (normalized to nuclear DNA expression) from isolated Ctrl and  $\beta$ -Mfn1/2<sup>DKO</sup> islets following transduction with Ad.EV or Ad.hTFAM adenoviral particles. n=10/group. \*p<0.05 by ANOVA.

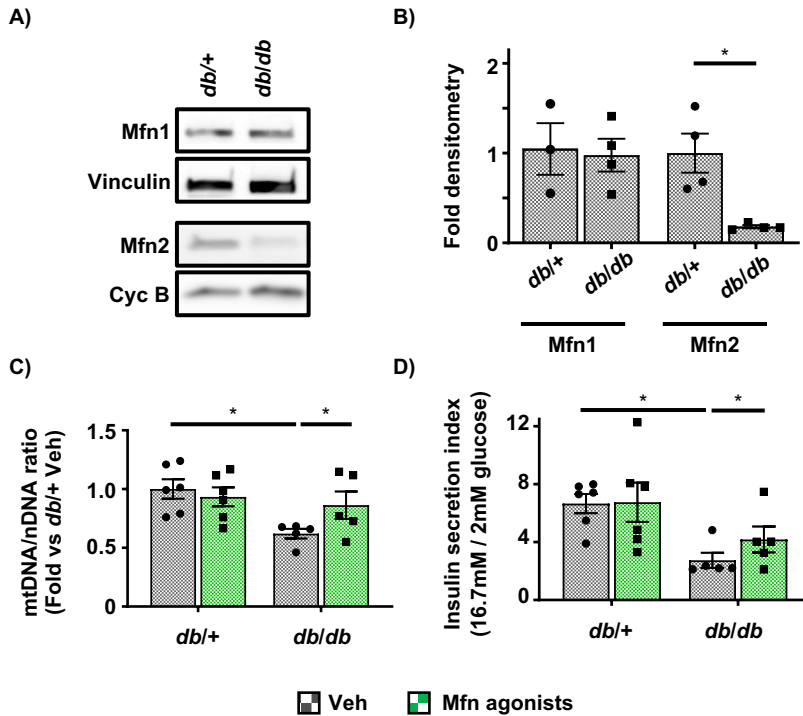

**Figure 8. Mitofusin agonists restore defects in mtDNA content and insulin secretion in islets of *db/db* mice.**

**(A)** Expression of Mfn1 and Mfn2 by WB in islets isolated from 10-12-week-old *db/+* and *db/db* mice. Vinculin and cyclophilin B serve as loading controls. Representative of 3-4 independent mice/group. **(B)** Densitometry (normalized to vinculin or cyclophilin B) from studies in Figure 8A. n= 3-4/group; \*p<0.05 by two-tailed t-test. **(C)** Relative mtDNA content measured by qPCR (normalized to nuclear DNA expression) from isolated islets of 10-12-week-old *db/+* and *db/db* mice following treatment with vehicle (Veh) or 0.5  $\mu$ M mitofusin agonists for 24 hrs. n=5-6/group. \*p<0.05 by two-tailed t-test. **(D)** Insulin secretion index from isolated islets of 10-12-week-old *db/+* and *db/db* mice following treatment with vehicle (Veh) or 0.5  $\mu$ M mitofusin agonists for 24 hrs. n=5-6/group. \*p<0.05 by two-tailed t-test.
